# Supplementary material for: Improving remote estimation of winter crops gross ecosystem production by inclusion of leaf area index in a spectral model
Source: PeerJ. 2018 Sep 21;6:e5613. doi: 10.7717/peerj.5613 (PMC6152453; doi:10.7717/peerj.5613)
Supplement: File S2 — This data are used to prepare Figs. 1 and 2. [file peerj-06-5613-s002.xlsx]

## Sheet: FIg.1
		2011	2012	2013
	Jan	31.1	73.8	38.4	47.7667
	Feb	60.4	30.5	26.1	39
	Mar	25	17.4	12.1	18.1667
	Apr	13.9	22.9	16.6	17.8				9	2.7	0.393013	0.162651	0.277832
	May	34	77	69.8	60.2667	331.1	362.8	343.9	43	35.8	0.558442	0.512894	0.535668
	Jun	46.3	79.8	125.3	83.8				33.5	79	0.419799	0.630487	0.525143
	Jul	179.4	98.8	68.6	115.6
	Aug	32.5	66.9	51.5	50.3				507.1	591.8	503.4
	Sep	27.4	29	34.2	30.2
	Oct	10.8	24.3	10.5	15.2					534.1
	Nov	0.6	54.8	32.5	29.3					50.0039
	Dec	45.7	16.6	17.8	26.7					9.36227
		507.1	591.8	503.4
		0.6	16.6	10.5
		179.4	98.8	125.3
		2011	2012	2013
	Jan	0.5	0.72	-1.53	-0.103333					9.40167	8.7825	8.67
	Feb	-3.2	-4.76	-0.19	-2.71667
	Mar	3.1	5.85	-2.56	2.13					8.95139
	Apr	11.7	8.83	7.41	9.31333					0.393988
	May	14.15	14.91	13.98	14.3467	14.02	13.9233	12.4333		4.40142
	Jun	18.57	16.03	17.29	17.2967
	Jul	17.8	19.21	19.45	18.82
	Aug	18.8	18.71	19.03	18.8467
	Sep	15.3	14.35	12.88	14.1767
	Oct	9.42	8.12	10.38	9.30667
	Nov	3.15	4.82	4.99	4.32
	Dec	3.53	-1.4	2.91	1.68
		-3.2	-4.76	-2.56
		18.8	19.21	19.45

## Sheet: FIg.2
						Winter wheat							ŻO	winter rye							spring barley								potato
	data	PARm	PARd		ENEP	EGEP	LAI	fAPAR	NDVI	SAVI	PRI		ENEP	EGEP	LAI	fAPAR	NDVI	SAVI	PRI		ENEP	EGEP	LAI	fAPAR	NDVI	SAVI	PRI		ENEP	EGEP	LAI	fAPAR	NDVI	SAVI	PRI
2011-01-01	2011-01-01	106.627	95.8899	1	-0.196559	0.405798						1	-0.583896	0.552728						1	-1.70667	0						1	-1.70667	0
2011-01-02	2011-01-02	100.56	92.0946	2	-0.0832484	0.394163						2	-0.433314	0.537506						2	-1.48117	0						2	-1.48117	0
2011-01-03	2011-01-03	123.585	113.074	3	-0.00265068	0.447976						3	-0.0969228	0.615939						3	-1.1173	0						3	-1.1173	0
2011-01-04	2011-01-04	159.012	145.057	4	0.243104	0.574449						4	0.165561	0.792036						4	-0.982771	0						4	-0.982771	0
2011-01-05	2011-01-05	85.0102	75.3015	5	-0.150713	0.322604						5	-0.48903	0.440672						5	-1.43645	0						5	-1.43645	0
2011-01-06	2011-01-06	89.2267	88.6149	6	-0.213216	0.352916						6	-0.448292	0.484065						6	-1.46322	0						6	-1.46322	0
2011-01-07	2011-01-07	152.739	139.847	7	0.0173713	0.498435						7	-0.0271559	0.688078						7	-1.13033	0						7	-1.13033	0
2011-01-08	2011-01-08	145.758	136.341	8	0.0952626	0.477462						8	0.0870035	0.658784						8	-0.90673	0						8	-0.90673	0
2011-01-09	2011-01-09	125.601	134.187	9	0.201069	0.459658						9	0.0998294	0.633696						9	-0.892961	0						9	-0.892961	0
2011-01-10	2011-01-10	125.363	112.216	10	-0.0595756	0.370325						10	-0.215079	0.510487						10	-1.24662	0						10	-1.24662	0
2011-01-11	2011-01-11	155.462	140.933	11	-0.198118	0.416425						11	-0.393278	0.577087						11	-1.79626	0						11	-1.79626	0
2011-01-12	2011-01-12	85.0598	77.6472	12	-0.542378	0.256109						12	-0.890906	0.351447						12	-2.55969	0						12	-2.55969	0
2011-01-13	2011-01-13	76.847	70.7486	13	-0.773909	0.223793						13	-1.15166	0.307325						13	-3.33611	0						13	-3.33611	0
2011-01-14	2011-01-14	559.043	576.696	14	0.184753	0.862854						14	0.194435	1.21221						14	-2.49018	0						14	-2.49018	0
2011-01-15	2011-01-15	37.67	135.55	15	-0.468057	0.128599						15	-0.569423	0.178067						15	-1.61946	0						15	-1.61946	0
2011-01-16	2011-01-16			16	-0.53119	0						16	-0.588521	0						16	-1.17696	0						16	-1.17696	0
2011-01-17	2011-01-17			17	-0.496217	0						17	-0.509104	0						17	-1.00745	0						17	-1.00745	0
2011-01-18	2011-01-18			18	-0.534999	0						18	-0.504033	0						18	-0.959668	0						18	-0.959668	0
2011-01-19	2011-01-19			19	-0.517952	0						19	-0.437559	0						19	-1.0672	0						19	-1.0672	0
2011-01-20	2011-01-20			20	-0.641194	0						20	-0.500422	0						20	-1.35208	0						20	-1.35208	0
2011-01-21	2011-01-21			21	-0.758974	0						21	-0.526098	0						21	-1.80882	0						21	-1.80882	0
2011-01-22	2011-01-22			22	-0.890593	0						22	-0.549974	0						22	-2.32	0						22	-2.32	0
2011-01-23	2011-01-23			23	-0.899117	0						23	-0.502394	0						23	-2.1615	0						23	-2.1615	0
2011-01-24	2011-01-24			24	-0.8564	0						24	-0.431884	0						24	-1.78793	0						24	-1.78793	0
2011-01-25	2011-01-25			25	-0.794546	0						25	-0.356634	0						25	-1.37522	0						25	-1.37522	0
2011-01-26	2011-01-26	135.414	306.387	26	-0.706191	0.15601						26	-0.169782	0.217364						26	-1.47194	0						26	-1.47194	0
2011-01-27	2011-01-27	39.4237	70.7484	27	-0.854808	0.0427054						27	-0.330191	0.0613864						27	-1.46791	0						27	-1.46791	0
2011-01-28	2011-01-28	33.7983	41.0291	28	-0.846472	0.0289981						28	-0.324823	0.0424012						28	-1.25374	0						28	-1.25374	0
2011-01-29	2011-01-29	61.0957	53.3296	29	-0.842019	0.0508512						29	-0.328182	0.0750837						29	-1.18638	0						29	-1.18638	0
2011-01-30	2011-01-30	112.854	88.0778	30	-0.893572	0.0633832						30	-0.51194	0.0935409						30	-1.24891	0						30	-1.24891	0
2011-01-31	2011-01-31	41.8123	39.5128	31	-0.926691	0.0183518						31	-0.373286	0.0288797						31	-1.191	0						31	-1.191	0
2011-02-01	2011-02-01			32	-0.878051	0						32	-0.522079	0						32	-0.855514	0						32	-0.855514	0
2011-02-02	2011-02-02	694.557	695.663	33	-0.71042	0.097014						33	-0.406216	0.0601512						33	-0.618936	0						33	-0.618936	0
2011-02-03	2011-02-03	800.45	808.918	34	-0.586462	0.113247						34	-0.382047	0.100087						34	-0.459345	0						34	-0.459345	0
2011-02-04	2011-02-04	58.0691	868.324	35	-0.631386	0.028545						35	-0.79704	0.0328258						35	-0.403711	0						35	-0.403711	0
2011-02-05	2011-02-05	119.46	100.851	36	-0.63568	0.0354516						36	-1.25477	0.0919647						36	-0.364821	0						36	-0.364821	0
2011-02-06	2011-02-06	192.93	159.498	37	-0.609464	0.0561762						37	-1.43861	0.146261						37	-0.306761	0						37	-0.306761	0
2011-02-07	2011-02-07			38	-0.606377	0						38	-1.17022	0						38	-0.291564	0						38	-0.291564	0
2011-02-08	2011-02-08	158.183	151.199	39	-0.506977	0.0613263						39	-0.909805	0.189515						39	-0.243527	0						39	-0.243527	0
2011-02-09	2011-02-09	302.772	276.79	40	-0.445967	0.0998516						40	-0.713621	0.294521						40	-0.232513	0						40	-0.232513	0
2011-02-10	2011-02-10	114.13	102.207	41	-0.526124	0.0488007						41	-1.02003	0.176423						41	-0.207326	0						41	-0.207326	0
2011-02-11	2011-02-11	532.55	450.781	42	-0.303668	0.140856						42	-0.206284	0.425516						42	-0.202553	0						42	-0.202553	0
2011-02-12	2011-02-12	375.259	330.125	43	-0.259527	0.123294						43	-0.0384946	0.417221						43	-0.186019	0						43	-0.186019	0
2011-02-13	2011-02-13	534.661	450.068	44	-0.196874	0.150342						44	0.128173	0.50537						44	-0.178239	0						44	-0.178239	0
2011-02-14	2011-02-14	384.43	518.572	45	-0.0881524	0.120509						45	0.293503	0.422274						45	-0.179434	0						45	-0.179434	0
2011-02-15	2011-02-15	342.77	266.466	46	-0.141096	0.124706						46	0.253553	0.505421						46	-0.171892	0						46	-0.171892	0
2011-02-16	2011-02-16	152.105	122.674	47	-0.219114	0.0759725						47	0.0612392	0.348092						47	-0.168346	0						47	-0.168346	0
2011-02-17	2011-02-17	100.773	87.4836	48	-0.215217	0.0641188						48	0.0493587	0.315199						48	-0.163703	0						48	-0.163703	0
2011-02-18	2011-02-18	269.242	191.163	49	-0.114598	0.122054						49	0.37094	0.565786						49	-0.152122	0						49	-0.152122	0
2011-02-19	2011-02-19	353.545	395.294	50	-0.00498629	0.144949						50	0.520177	0.609745						50	-0.160351	0						50	-0.160351	0
2011-02-20	2011-02-20	565.001	563.507	51	0.16421	0.252415						51	1.05353	1.08796						51	-0.159442	0						51	-0.159442	0
2011-02-21	2011-02-21	303.337	455.005	52	-0.0205708	0.0815689						52	0.375698	0.411493						52	-0.155404	0						52	-0.155404	0
2011-02-22	2011-02-22	393.703	631.707	53	0.029071	0.149915						53	0.764611	0.812564						53	-0.151552	0						53	-0.151552	0
2011-02-23	2011-02-23	609.706	487.696	54	0.0932933	0.242965						54	1.34537	1.41455						54	-0.151648	0						54	-0.151648	0
2011-02-24	2011-02-24	607.936	484.361	55	0.0307772	0.252191						55	1.41438	1.54198						55	-0.158538	0						55	-0.158538	0
2011-02-25	2011-02-25	628.112	501.613	56	-0.0419029	0.26391						56	1.458	1.67544						56	-0.166055	0						56	-0.166055	0
2011-02-26	2011-02-26	573.119	449.511	57	-0.176734	0.260815						57	1.27765	1.69236						57	-0.189713	0						57	-0.189713	0
2011-02-27	2011-02-27	575.945	472.708	58	-0.168442	0.271779						58	1.40357	1.80918						58	-0.18895	0						58	-0.18895	0
2011-02-28	2011-02-28	677.244	550.012	59	-0.175697	0.301352						59	1.60431	2.06817						59	-0.204543	0						59	-0.204543	0
2011-03-01	2011-03-01	667.484	544.913	60	-0.25344	0.305204						60	1.627	2.12857						60	-0.22146	0						60	-0.22146	0
2011-03-02	2011-03-02	371.14	377.958	61	-0.428783	0.201813						61	0.82353	1.38024						61	-0.23127	0						61	-0.23127	0
2011-03-03	2011-03-03	14.1821	241.216	62	-0.574852	0.10083						62	0.045135	0.675688						62	-0.276306	0						62	-0.276306	0
2011-03-04	2011-03-04	178.816	151.8	63	-0.570809	0.173316						63	0.230267	1.04802						63	-0.289862	0						63	-0.289862	0
2011-03-05	2011-03-05	780.32	608.034	64	-0.371586	0.386799						64	2.04997	2.87376						64	-0.296638	0						64	-0.296638	0
2011-03-06	2011-03-06	783.045	601.262	65	-0.379894	0.389296						65	2.13339	2.91726						65	-0.302049	0						65	-0.302049	0
2011-03-07	2011-03-07	740.827	570.08	66	-0.452309	0.37704						66	1.963	2.83997						66	-0.329025	0						66	-0.329025	0
2011-03-08	2011-03-08	722.581	548.594	67	-0.550864	0.386022						67	1.51924	2.8838						67	-0.486285	0						67	-0.486285	0
2011-03-09	2011-03-09	688.686	480.622	68	-0.674279	0.357183						68	0.90758	2.64068						68	-0.618593	0						68	-0.618593	0
2011-03-10	2011-03-10	677.127	487.812	69	-0.742563	0.368611						69	0.854252	2.72998						69	-0.685312	0						69	-0.685312	0
2011-03-11	2011-03-11	739.837	527.992	70	-0.816721	0.391232						70	1.39138	2.95796						70	-0.614628	0						70	-0.614628	0
2011-03-12	2011-03-12	768.454	549.565	71	-0.971839	0.398206						71	1.0976	3.06378						71	-0.834911	0						71	-0.834911	0
2011-03-13	2011-03-13	391.737	276.153	72	-1.16695	0.265508						72	-0.250302	1.81322						72	-0.846568	0						72	-0.846568	0
2011-03-14	2011-03-14	447.234	370.477	73	-1.22711	0.306002						73	0.272203	2.24757						73	-0.793219	0						73	-0.793219	0
2011-03-15	2011-03-15	540.976	427.538	74	-1.25441	0.349902						74	0.743419	2.626						74	-0.743861	0						74	-0.743861	0
2011-03-16	2011-03-16	459.598	353.989	75	-1.3389	0.338471						75	0.764532	2.49083						75	-0.644863	0						75	-0.644863	0
2011-03-17	2011-03-17	569.964	430.943	76	-1.40222	0.387335						76	1.32403	2.95684						76	-0.581223	0						76	-0.581223	0
2011-03-18	2011-03-18	556.48	492.092	77	-1.36524	0.446259						77	1.65092	3.29551						77	-0.561496	0						77	-0.561496	0
2011-03-19	2011-03-19	442.94	349.577	78	-1.40193	0.408126						78	1.12019	2.62587						78	-0.489003	0						78	-0.489003	0
2011-03-20	2011-03-20	833.203	561.287	79	-1.22289	0.597634						79	2.14162	3.92321						79	-0.617276	0						79	-0.617276	0
2011-03-21	2011-03-21	940.881	670.989	80	-1.09437	0.704185						80	1.94642	4.52392						80	-0.985746	0						80	-0.985746	0
2011-03-22	2011-03-22	900.215	698.226	81	-1.0721	0.788975						81	2.33244	4.82482						81	-0.887789	0						81	-0.887789	0
2011-03-23	2011-03-23	861.282	647.334	82	-1.08932	0.818958						82	2.05121	4.72436						82	-0.934249	0						82	-0.934249	0
2011-03-24	2011-03-24	238.248	247.503	83	-1.42763	0.470333						83	-0.167295	2.31355						83	-0.803106	0						83	-0.803106	0
2011-03-25	2011-03-25	269.883	209.308	84	1.6557	4.20173						84	3.02506	6.26568						84	-0.116738	0						84	-0.116738	0
2011-03-26	2011-03-26	293.097	222.971	85	1.96153	4.31846						85	2.13705	4.61964						84	-0.588735	0						85	-0.558978	0
2011-03-27	2011-03-27	771.439	531.743	86	5.12859	7.30332						86	6.28921	8.62655						85	-0.635692	0						86	-0.516766	0
2011-03-28	2011-03-28	1224.17	702.906	87	5.30904	7.8593						87	6.78472	9.68415						86	-0.588648	0						87	-0.552695	0
2011-03-29	2011-03-29	1360.86	820.617	88	5.93495	8.68138						88	7.70254	10.8261						87	-0.635621	0						88	-0.581703	0
2011-03-30	2011-03-30	1204.99	706.268	89	4.89603	8.12567						89	6.16145	9.96803						88	-0.673211	0						89	-0.633191	0
2011-03-31	2011-03-31	890.704	446.564	90	2.67338	6.21405						90	2.95199	7.22172						89	-0.755927	0						90	-0.671724	0
2011-04-01	2011-04-01	1319.96	764.257	91	3.78433	8.19798						91	4.91064	10.173						90	-0.821146	0						91	-0.790234	0
2011-04-02	2011-04-02	403.627	239.127	92	0.43557	4.53139						92	0.154719	4.90117						91	-0.99845	0						92	-0.775278	0
2011-04-03	2011-04-03	1309.14	765.452	93	4.01758	8.44284						93	5.24257	10.4318						92	-0.992548	0						93	-0.804215	0
2011-04-04	2011-04-04	200.71	168.831	94	0.0963387	3.72751						94	-0.219307	3.85925						93	-1.06059	0						94	-0.73437	0
2011-04-05 23:30:00	2011-04-05 23:30:00	1050.27	628.513	95	3.8223	7.78029						95	4.61835	9.16952						94	-0.974392	0						95	-0.757487	0
2011-04-06 23:30:00	2011-04-06 23:30:00	414.256	248.995	96	0.812486	4.87023						96	0.507141	5.27692						95	-1.04015	0						96	-0.764162	0
2011-04-07 23:30:00	2011-04-07 23:30:00	1137.07	640.66	97	2.83448	7.59907						97	3.61836	9.18252						96	-1.06861	0						97	-0.853886	0
2011-04-08 23:30:00	2011-04-08 23:30:00	594.744	295.436	98	0.926544	4.60628						98	0.977139	5.17876						97	-1.22568	0						98	-0.731974	0
2011-04-09 23:30:00	2011-04-09 23:30:00	1321.11	818.515	99	5.58784	9.32649						99	7.61928	11.6471						98	-1.05927	0						99	-0.756027	0
2011-04-10 23:30:00	2011-04-10 23:30:00	1378.44	830.642	100	5.64042	9.40155						100	7.60346	11.7447						99	-1.12268	0						100	-0.746823	0
2011-04-11 23:30:00	2011-04-11	857.48	555.671	101	3.87388	8.39313	0.733333		0.432696	0.066	-0.186	101	4.80755	9.98422	1.03333		0.624341	0.108	-0.184	100	-1.1353	0	0		-0.00156246	0	-0.196	101	-0.831677	0	0		-0.00106816	0	-0.195
2011-04-12 23:30:00	2011-04-12 14:00:00	466.911	317.646	102	2.31497	5.96041						102	2.5635	6.60905						101	-1.2944	0						102	-0.741546	0
2011-04-13 23:30:00	2011-04-13 14:00:00	351.967	181.941	103	0.890214	3.81849						103	0.819844	4.02906						102	-1.15618	0						103	-0.640378	0
2011-04-14 23:30:00	2011-04-14 14:00:00	1048.2	662.315	104	4.63063	8.01419						104	6.18636	9.78013						103	-0.985757	0.0287594						104	-0.708659	0
2011-04-15 23:30:00	2011-04-15 14:00:00	1076.78	706.382	105	4.76457	8.33959						105	6.60109	10.2437						104	-0.861629	0.295833						105	-0.751649	0
2011-04-16 23:30:00	2011-04-16 14:00:00	1508	892.241	106	5.65589	9.61498						106	7.91087	12.0807						105	-0.704845	0.546658						106	-0.792216	0
2011-04-17 23:30:00	2011-04-17 14:00:00	750.344	442.337	107	2.22628	6.46414						107	2.72031	7.5546						106	-0.443332	0.902376						107	-0.803916	0
2011-04-18 23:30:00	2011-04-18 14:00:00	1354.78	874.151	108	5.00636	9.67385						108	7.0907	12.1261						107	-0.590028	0.795234						108	-0.881416	0
2011-04-19 23:30:00	2011-04-19 14:00:00	1476.11	940.896	109	5.53971	9.96527						109	7.61379	12.5487						108	-0.0884095	1.46417						109	-0.908532	0
2011-04-20 23:30:00	2011-04-20 14:00:00	1517.11	931.329	110	6.46524	10.6255						110	8.09823	12.7993						109	0.160002	1.78864						110	-0.88154	0
2011-04-21 23:30:00	2011-04-21 14:00:00	1485.44	912.976	111	6.36384	10.9845	1.16667		0.699218	0.158	-0.188	111	7.51881	12.6869	2.03333		0.834036	0.197	-0.189	110	0.468226	2.114	0.3		0.127959	0.031	-0.193	111	-0.892911	0	0		-0.0125079	0	-0.2
2011-04-22 23:30:00	2011-04-22 14:00:00	1446.44	874.062	112	6.18778	11.1064						112	6.9225	12.3618						111	0.608439	2.34737						112	-0.897442	0
2011-04-23 23:30:00	2011-04-23 14:00:00	1486.22	916.52	113	6.5727	11.6309						113	7.18914	12.6281						112	0.686379	2.50254						113	-0.910761	0
2011-04-24 23:30:00	2011-04-24 14:00:00	1495.56	863.171	114	6.40359	11.2794						114	6.87677	11.9385						113	0.833011	2.74721						114	-0.876851	0
2011-04-25 23:30:00	2011-04-25 14:00:00	591.056	438.588	115	3.04829	7.40951						115	3.03959	7.44255						114	0.833092	2.76544						115	-0.778119	0
2011-04-26 23:30:00	2011-04-26 14:00:00	1127.33	634.917	116	4.32756	9.32264						116	4.37129	9.412						115	-0.0138117	1.8245						116	-0.814852	0
2011-04-27 23:30:00	2011-04-27 14:00:00	1352.78	855.229	117	6.05589	11.5519						117	6.28331	11.6735						116	0.456513	2.42002						117	-0.848611	0
2011-04-28 23:30:00	2011-04-28 14:00:00	1255.33	668.092	118	3.93463	9.54383	1.46667		0.721401	0.136	-0.176	118	4.12475	9.5303	2.36667		0.875287	0.189	-0.151	117	1.07263	3.15865	0.433333		0.276201	0.05	-0.188	118	-0.826071	0	0		0.00714646	0	-0.189
2011-04-29 23:30:00	2011-04-29 14:00:00	1425.67	805.086	119	5.08668	10.8652						119	5.63214	10.858						118	0.584887	2.69638						119	-0.80951	0
2011-04-30 23:30:00	2011-04-30 14:00:00	1597.78	986.13	120	6.45936	12.1418						120	7.52937	12.1486						119	1.05852	3.22698						120	-0.743145	0
2011-05-01 23:30:00	2011-05-01 14:00:00	1570.44	895.229	121	5.23019	10.4894						121	6.48416	10.5212						120	1.61136	3.79453						121	-0.636313	0
2011-05-02 23:30:00	2011-05-02 14:00:00	808.822	535.237	122	2.4391	6.80508						122	3.58391	6.9004						121	1.33335	3.44745						122	-0.486592	0
2011-05-03 23:30:00	2011-05-03 14:00:00	438.956	428.104	123	1.4744	5.10549						123	2.48081	5.27251						122	0.428278	2.38193						123	-0.367994	0
2011-05-04 23:30:00	2011-05-04 14:00:00	702.5	609.199	124	3.29275	6.70761						124	4.41308	7.03894						123	0.13022	1.93851						124	-0.313647	0
2011-05-05 23:30:00	2011-05-05 14:00:00	1594.78	834.543	125	3.54982	7.83105						125	5.24394	8.36545						124	0.97972	2.74906						125	-0.355041	0
2011-05-06 23:30:00	2011-05-06 14:00:00	1651.22	1002.84	126	2.54968	8.57012	1.63333		0.728621	0.259	-0.201	126	5.4397	9.46803	2.86667		0.834565	0.327	-0.186	125	1.53845	3.48369	0.433333		0.338523	0.137	-0.202	126	-0.477895	0	0		0.00714606	0	-0.198
2011-05-07 23:30:00	2011-05-07 14:00:00	1667.56	1019.7	127	1.77445	8.5318						127	5.65077	10.1185						126	1.99948	4.24146						127	-0.610713	0
2011-05-08 23:30:00	2011-05-08 14:00:00	575.022	599.444	128	-0.198255	5.45434						128	3.03022	7.18344						127	2.28588	4.78682						128	-0.61668	0
2011-05-09 23:30:00	2011-05-09 14:00:00	1668.44	1022.6	129	1.42004	8.32989						129	6.26253	11.1993						128	1.16094	3.64114						129	-0.859272	0
2011-05-10 23:30:00	2011-05-10 14:00:00	1685.44	1032.07	130	0.332917	8.2587						130	6.01529	11.6977						129	2.8264	5.73395						130	-1.12464	0
2011-05-11 23:30:00	2011-05-11 14:00:00	1653.33	916.971	131	-0.775244	7.39373						131	5.02364	11.1557						130	2.79932	6.17157						131	-1.32891	0
2011-05-12 23:30:00	2011-05-12 14:00:00	1308.78	729.092	132	-1.71838	5.79644						132	3.6049	9.3462						131	2.36731	6.09215						132	-1.26164	0.0501479
2011-05-13 23:30:00	2011-05-13 14:00:00	713.044	507.876	133	-0.529425	4.35374						133	3.55629	7.73461						132	1.49746	5.277						133	-0.750801	0.193189
2011-05-14 23:30:00	2011-05-14 14:00:00	1055.09	667.411	134	0.909076	5.52306	1.96667		0.793932	0.172	-0.187	134	5.76023	10.0448	2.63333		0.833264	0.179	-0.168	133	1.58793	4.55931	0.833333		0.556315	0.133	-0.206	134	-0.65002	0.397394	0		0.0321504	0.01	-0.198
2011-05-15 23:30:00	2011-05-15 14:00:00	645.044	425.385	135	-0.335505	3.54609						135	3.42159	7.12806						134	2.90589	6.00586						135	-0.499643	0.426663
2011-05-16 23:30:00	2011-05-16 14:00:00	1078.63	657.748	136	1.63708	5.25325						136	6.59152	10.2616						135	1.62267	4.42564						136	-0.275378	0.708752
2011-05-17 23:30:00	2011-05-17 14:00:00	625.689	411.407	137	-0.811954	3.29229						137	2.63902	7.11071						136	3.54583	6.3896						137	-0.656344	0.635976
2011-05-18 23:30:00	2011-05-18 14:00:00	1377.56	804.253	138	1.0492	6.06657						138	6.67087	12.0042						137	1.2484	4.58191						138	-0.507112	1.13855
2011-05-19 23:30:00	2011-05-19 14:00:00	1631.33	823.457	139	0.340757	5.86591						139	5.77559	11.8454						138	3.53839	7.75121						139	-0.701915	1.28031
2011-05-20 23:30:00	2011-05-20 14:00:00	1425.67	897.346	140	0.506223	5.82578						140	5.9332	11.8504						139	2.89641	7.82066						140	-0.574552	1.42957
2011-05-21 23:30:00	2011-05-21 14:00:00	1576.22	949.909	141	1.75733	6.64468						141	8.15706	13.7574						140	3.00801	8.00721						141	-0.101176	1.85743
2011-05-22 23:30:00	2011-05-22 14:00:00	1694.33	1020.6	142	1.89519	6.91185						142	8.18761	14.3017						141	4.72143	9.54473						142	-0.114283	2.12114
2011-05-23 23:30:00	2011-05-23 14:00:00	1553.67	989.144	143	2.0778	6.66542						143	8.52277	14.1809						142	4.85316	10.1902						143	0.215089	2.32024
2011-05-24 23:30:00	2011-05-24 14:00:00	1747.33	943.915	144	1.80365	6.07136						144	7.18652	12.8112						143	5.44076	10.4007						144	0.133634	2.28251
2011-05-25 23:30:00	2011-05-25 14:00:00	1194.22	794.319	145	2.58025	5.62309						145	9.09633	13.2087						144	4.8207	9.67661						145	0.968216	2.59817
2011-05-26 23:30:00	2011-05-26 14:00:00	1745.11	1009.14	146	2.81646	6.4588	2.36667		0.755654	0.276	-0.181	146	8.8055	14.1077	2.7		0.729075	0.265	-0.181	145	6.89013	10.2457	2.36667		0.753662	0.296	-0.185	146	0.83561	3.00365	0.466667		0.317025	0.13	-0.188
2011-05-27 23:30:00	2011-05-27 14:00:00	685.889	496.564	147	-0.172924	3.56636						147	4.36161	9.82004						146	7.03616	11.3319						147	0.126841	2.39457
2011-05-28 23:30:00	2011-05-28 14:00:00	1212.49	671.333	148	1.59957	4.53648						148	7.14073	11.4364						147	3.27619	7.60153						148	1.23141	3.04604
2011-05-29 23:30:00	2011-05-29 14:00:00	1208.33	697.726	149	1.11814	4.39739						149	6.14692	11.1157						148	5.51021	8.79331						149	1.08644	3.25218
2011-05-30 23:30:00	2011-05-30 14:00:00	1733.22	1036.67	150	2.02163	6.00856						150	7.35413	13.688						149	4.53	8.38853						150	1.37691	4.21338
2011-05-31 23:30:00	2011-05-31 14:00:00	1740.89	1032.7	151	1.53898	5.81366						151	6.44443	13.4034						150	5.21903	10.2314						151	1.23594	4.44046
2011-06-01 23:30:00	2011-06-01 14:00:00	848.344	697.458	152	0.929554	4.20874						152	5.85129	11.0674						151	4.29206	9.80581						152	1.66445	4.08814
2011-06-02 23:30:00	2011-06-02 14:00:00	1634.56	1038.46	153	2.1944	5.4056						153	7.80007	13.0311						152	3.93389	7.85374						153	2.46012	4.97108
2011-06-03 23:30:00	2011-06-03 14:00:00	1763.44	1068.49	154	2.22042	5.45202						154	7.79172	13.1853						153	5.14517	9.08128						154	2.6538	5.33725
2011-06-04 23:30:00	2011-06-04 14:00:00	1723	1039.41	155	1.74766	5.16476	2.66667		0.76065	0.24	-0.181	155	6.99172	12.8608	2.4		0.651811	0.182	-0.191	154	4.86872	8.94998	2.53333		0.846866	0.267	-0.174	155	2.50942	5.55309	1.6		0.769286	0.27	-0.175
2011-06-05 23:30:00	2011-06-05 14:00:00	1701.33	975.589	156	1.15083	4.68715						156	5.80791	12.055						155	3.97614	8.4809						156	2.16657	5.55754
2011-06-06 23:30:00	2011-06-06 14:00:00	1711.33	1004.98	157	1.12467	4.63152						157	5.79266	12.1096						156	2.83309	7.7057						157	2.30996	5.87117
2011-06-07 23:30:00	2011-06-07 14:00:00	1374	869.13	158	1.03701	4.09607						158	6.04807	11.552						157	2.54317	7.48041						158	2.93656	6.0346
2011-06-08 23:30:00	2011-06-08 14:00:00	1638.33	765.575	159	0.427483	3.34243						159	4.36033	9.69295						158	2.8063	6.89368						159	2.24899	5.3742
2011-06-09 23:30:00	2011-06-09 14:00:00	826.944	428.228	160	-0.262323	2.10309						160	3.09895	7.3435						159	1.60065	5.56761						160	2.25461	4.60417
2011-06-10 23:30:00	2011-06-10 14:00:00	1389.78	887.727	161	1.25328	3.56189						161	6.8824	11.1105						160	1.31355	4.11295						161	4.35458	6.78353
2011-06-11 23:30:00	2011-06-11 14:00:00	1553	942.41	162	1.15864	3.38314						162	6.93052	11.0846						161	2.98215	5.76821						162	4.58911	7.08943
2011-06-12 23:30:00	2011-06-12 14:00:00	1577.89	728.424	163	0.277286	2.43812						163	4.8396	8.93886						162	2.66416	5.4217						163	3.72594	6.22124
2011-06-13 23:30:00	2011-06-13 14:00:00	1405.44	828.721	164	0.518481	2.63984						164	6.23199	10.3519						163	1.54428	4.17913						164	4.75922	7.4239
2011-06-14 23:30:00	2011-06-14 14:00:00	936.944	609.061	165	-0.361749	1.78584						165	3.79163	8.0263						164	1.71805	4.42312						165	3.39297	6.23218
2011-06-15 23:30:00	2011-06-15 14:00:00	1205.11	699.313	166	-0.314603	1.9682						166	4.60306	8.88853						165	0.472405	3.25284						166	4.1774	7.07944
2011-06-16 23:30:00	2011-06-16 14:00:00	1056.73	693.209	167	-0.698992	1.8384						167	3.90308	8.47366						166	0.731844	3.55059						167	3.85148	7.13119
2011-06-17 23:30:00	2011-06-17 14:00:00	1537.56	827.049	168	-0.706036	1.93624						168	4.43211	8.90799						167	0.296829	3.46472						168	4.5601	7.65698
2011-06-18 23:30:00	2011-06-18 14:00:00	631.8	364.616	169	-1.54039	1.0806						169	1.08506	5.36903						168	0.615916	3.60735						169	2.43953	5.33668
2011-06-19 23:30:00	2011-06-19 14:00:00	1085.11	796.641	170	-0.936022	1.82817						170	4.40152	8.70114						169	-0.388176	2.41832						170	5.3273	8.2179
2011-06-20 23:30:00	2011-06-20 14:00:00	602.378	466.738	171	-1.52893	1.2195						171	2.02043	6.15822						170	0.839666	3.64732						171	3.8936	6.60332
2011-06-21 23:30:00	2011-06-21 14:00:00	1546.56	821.511	172	-1.48516	1.68222						172	3.68435	8.28334						171	0.138776	2.80734						172	5.36729	8.6477
2011-06-22 23:30:00	2011-06-22 14:00:00	1359	855.313	173	-2.16321	1.58118						173	2.54679	7.91565						172	0.487089	3.61033						173	4.46358	8.61853
2011-06-23 23:30:00	2011-06-23 14:00:00	1410.44	778.242	174	-2.44471	1.40294						174	1.96364	7.20666						173	-0.261579	3.50036						174	4.45973	8.40444
2011-06-24 23:30:00	2011-06-24 14:00:00	1176.91	646.956	175	-2.56818	1.16868						175	1.54385	6.26125						174	-0.314772	3.29973						175	4.71675	8.03545
2011-06-25 23:30:00	2011-06-25 14:00:00	1209.6	695.482	176	-2.37945	1.18431						176	2.01879	6.53378						175	-0.167264	3.03489						176	5.82686	8.93471
2011-06-26 23:30:00	2011-06-26 14:00:00	873.556	520.138	177	-2.84344	0.896824						177	0.469178	5.27668						176	0.200558	3.27327						177	4.8548	8.30227
2011-06-27 23:30:00	2011-06-27 14:00:00	1685	986.134	178	-3.62903	1.19616						178	1.24716	6.84273						177	-0.408794	2.89592						178	5.68383	10.0377
2011-06-28 23:30:00	2011-06-28 14:00:00	1786.78	1061.03	179	-4.41533	1.11867	1.63333		0.27175	0.071	-0.234	179	0.840436	6.70332	1.93333		0.31615	0.089	-0.221	178	-0.298144	3.51951	2.26667		0.648905	0.182	-0.243	179	5.85006	10.5376	1.8		0.714239	0.28	-0.206
2011-06-29 23:30:00	2011-06-29 14:00:00	1699.22	960.818	180	-5.32731	0.892466						180	-0.719373	5.75919						179	-0.353851	3.60184						180	4.75424	10.2146
2011-06-30 23:30:00	2011-06-30 14:00:00	1005.39	469.638	181	-5.17639	0.470974						181	-2.80656	3.18835						180	-0.917477	3.36613						181	1.98251	6.73424
2011-07-01 23:30:00	2011-07-01 14:00:00	414.156	304.699	182	-3.6983	0.34526						182	-2.42081	2.48657						181	-1.8976	2.1087						182	2.89244	6.43734
2011-07-02 23:30:00	2011-07-02 14:00:00	347.467	201.764	183	-3.31831	0.237984						183	-2.75118	1.72954						182	-1.51529	1.91887						183	1.89208	4.99632
2011-07-03 23:30:00	2011-07-03 14:00:00	490.9	480.341	184	-3.51674	0.489636						184	-1.79165	3.17018						183	-1.73794	1.44124						184	3.38058	7.06399
2011-07-04 23:30:00	2011-07-04 14:00:00	1252.28	678.351	185	-3.96952	0.609295						185	-1.70016	3.64403						184	-1.25042	2.21455						185	3.10786	7.24573
2011-07-05 23:30:00	2011-07-05 14:00:00	1510.44	766.989	186	-4.1115	0.731618						186	-1.04383	4.27668						185	-1.33696	2.33949						186	4.34457	8.42523
2011-07-06 23:30:00	2011-07-06 14:00:00	1753.67	1031.71	187	-4.53006	0.934168						187	-0.560864	5.19534						186	-0.889712	2.74484						187	4.9863	9.58225
2011-07-07 23:30:00	2011-07-07 14:00:00	1315.16	787.782	188	-4.85744	0.77442						188	-1.44797	4.37269						187	-0.673904	3.19393						188	4.16075	8.82569
2011-07-08 23:30:00	2011-07-08 14:00:00	360.22	393.918	189	-4.46549	0.438425						189	-2.74549	2.58894						188	-1.00298	2.89056						189	2.2545	6.40198
2011-07-09 23:30:00	2011-07-09 14:00:00	1699.78	954.808	190	-4.39718	0.865029						190	-1.13417	4.55068						189	-1.64931	1.99186						190	4.23163	8.89234
2011-07-10 23:30:00	2011-07-10 14:00:00	1203.06	693.854	191	-4.86253	0.657103						191	-2.27543	3.45982						190	-0.913476	2.95498						191	2.74482	7.39331
2011-07-11 23:30:00	2011-07-11 14:00:00	250.111	203.485	192	-4.35101	0.229737						192	-3.49997	1.33989						191	-1.46576	2.40724						192	0.442537	4.03282
2011-07-12 23:30:00	2011-07-12 14:00:00	1545.78	863.255	193	-3.9414	0.801096						193	-1.12431	3.95648						192	-2.09792	1.21216						193	4.18682	8.19998
2011-07-13 23:30:00	2011-07-13 14:00:00	864.744	522.486	194	-4.07925	0.530293						194	-2.42546	2.70447						193	-0.79032	2.71955						194	2.31286	6.49449
2011-07-14 23:30:00	2011-07-14 14:00:00	709.733	575.84	195	-4.13921	0.573506						195	-2.21147	2.81058						194	-1.50953	2.09466						195	2.721	6.6565
2011-07-15 23:30:00	2011-07-15 14:00:00	1460.11	757.992	196	-3.87455	0.698369						196	-1.50713	3.2233						195	-1.30646	2.16404						196	3.54887	7.16276
2011-07-16 23:30:00	2011-07-16 14:00:00	1440.11	862.913	197	-4.20603	0.762155						197	-1.52838	3.34644						196	-0.902332	2.36985						197	3.49652	7.21464
2011-07-17 23:30:00	2011-07-17 14:00:00	1536.22	837.71	198	-4.51702	0.742744						198	-2.02422	3.17553						197	-0.901168	2.41126						198	2.74086	6.98208
2011-07-18 23:30:00	2011-07-18 14:00:00	1296.42	720.395	199	-4.19636	0.63814						199	-1.99883	2.6876						198	-1.25357	2.33276						199	2.76709	6.26614
2011-07-19 23:30:00	2011-07-19 14:00:00	1617.67	949.857	200	-4.22253	0.843201						200	-1.45706	3.38245						199	-1.08313	2.08197						200	3.7577	7.5139
2011-07-20 23:30:00	2011-07-20 14:00:00	347.956	302.729	201	-4.13289	0.296204						201	-3.19308	1.27159						200	-0.761435	2.53808						201	0.345652	3.74919
2011-07-21 23:30:00	2011-07-21 14:00:00	168.478	127.814	202	-3.66761	0.141344						202	-3.35779	0.629985						201	-1.88311	1.20698						202	-0.58697	2.38069
2011-07-22 23:30:00	2011-07-22 14:00:00	289.733	172.338	203	-3.12688	0.186614						203	-2.76859	0.791302						202	-2.0632	0.733126						203	0.27254	2.85238
2011-07-23 23:30:00	2011-07-23 14:00:00	782.822	521.877	204	-2.73227	0.511489						204	-1.61372	1.90131						203	-1.62006	0.897995						204	2.65306	5.27218
2011-07-24 23:30:00	2011-07-24 14:00:00	1267.79	736.196	205	-2.83107	0.700866						205	-1.28074	2.44024						204	-0.769907	1.75759						205	3.44261	6.34456
2011-07-25 23:30:00	2011-07-25 14:00:00	1639.11	977.328	206	-2.99762	0.85025						206	-1.11604	2.73915						205	-0.545932	2.15092						206	3.69551	6.66664
2011-07-26 23:30:00	2011-07-26 14:00:00	1634.11	839.006	207	-2.88855	0.760934						207	-1.59491	2.3414						206	-0.444943	2.28968						207	2.92747	6.03347
2011-07-27 23:30:00	2011-07-27 14:00:00	799.667	379.194	208	-2.73358	0.491228						208	-2.68863	1.2177						207	-0.749327	2.06853						208	0.809365	3.89854
2011-07-28 23:30:00	2011-07-28 14:00:00	374.011	313.732	209	-2.46308	0.536345						209	-2.56634	1.05554						208	-1.49239	1.31279						209	0.942801	3.70639
2011-07-29 23:30:00	2011-07-29 14:00:00	430.267	251.903	210	-2.23405	0.532608						210	-2.5383	0.853785						209	-1.31682	1.24972						210	0.619058	3.1729
2011-07-30 23:30:00	2011-07-30 14:00:00	366.733	240.215	211	-2.13984	0.565908						211	-2.53603	0.748675						210	-1.32914	1.07263						211	0.469825	2.95547
2011-07-31 23:30:00	2011-07-31 14:00:00	348.933	344.998	212	-2.13705	0.829171						212	-2.51858	0.940656						211	-1.3339	1.0048						212	0.73948	3.47499
2011-08-01 23:30:00	2011-08-01 14:00:00	1113.26	656.27	213	-2.05476	1.36846						213	-2.26163	1.42738						212	-1.30926	1.201						213	1.63364	4.57608
2011-08-02 23:30:00	2011-08-02 14:00:00	610.022	590.503	214	-2.09065	1.29402						214	-2.418	1.16842						213	-1.04293	1.60652						214	1.16363	3.97788
2011-08-03 23:30:00	2011-08-03 14:00:00	1460.89	831.038	215	-1.76801	1.80548						215	-2.16687	1.49736						214	-1.13952	1.40493						215	1.96545	4.90049
2011-08-04 23:30:00	2011-08-04 14:00:00	1543.56	945.681	216	-1.69569	2.02035						216	-2.16765	1.53152						215	-0.87793	1.74469						216	1.95955	4.9997
2011-08-05 23:30:00	2011-08-05 14:00:00	1412	735.783	217	-2.45608	1.70067						217	-2.99731	0.945596						216	-0.901619	1.78935						217	0.982303	4.17197
2011-08-06 23:30:00	2011-08-06 14:00:00	1413.78	831.178	218	-2.38879	1.90101						218	-3.27694	0.700904						217	-1.28051	1.51048						218	1.30471	4.48909
2011-08-07 23:30:00	2011-08-07 14:00:00	769.978	370.972	219	-2.67566	1.13605						219	-2.96391	0.757148						218	-1.09368	1.67312						219	-0.135613	2.8038
2011-08-08 23:30:00	2011-08-08 14:00:00	1054.22	620.389	220	-1.81667	1.63297						220	-2.34116	1.15187						219	-1.46657	1.07742						220	0.96416	3.73219
2011-08-09 23:30:00	2011-08-09 14:00:00	1081.1	725.438	221	-1.1675	1.81095						221	-1.9344	1.30773						220	-0.895497	1.48177						221	1.33053	3.9296
2011-08-10 23:30:00	2011-08-10 14:00:00	754.578	468.267	222	-1.21489	1.44468						222	-2.10502	0.969712						221	-0.60558	1.60985						222	0.69229	3.18946
2011-08-11 23:30:00	2011-08-11 14:00:00	456.622	393.844	223	-1.47693	1.27052						223	-2.30302	0.838763						222	-0.76125	1.35331						223	0.147585	2.74504
2011-08-12 23:30:00	2011-08-12 14:00:00	1163.63	628.345	224	-1.90281	1.60002						224	-2.36789	1.13988						223	-0.997523	1.20655						224	0.249513	3.17647
2011-08-13 23:30:00	2011-08-13 14:00:00	861.089	601.962	225	-2.00657	1.59549						225	-2.41147	1.12252						224	-1.04547	1.44195						225	0.134029	3.07299
2011-08-14 23:30:00	2011-08-14 14:00:00	1104.44	729.54	226	-2.06812	1.80629						226	-2.29312	1.30719						225	-1.90303	0.52279						226	0.248807	3.27335
2011-08-15 23:30:00	2011-08-15 14:00:00	1173	554.338	227	-2.62337	1.36621						227	-2.69494	0.963475						226	-2.50707	0						227	-0.638975	2.44914
2011-08-16 23:30:00	2011-08-16 14:00:00	1344.78	737.172	228	-2.22298	1.709						228	-2.27641	1.24404						227	-2.55275	0						228	-0.133944	2.8517
2011-08-17 23:30:00	2011-08-17 14:00:00	1295.39	816.105	229	-2.42451	1.86787						229	-2.26339	1.36736						228	-2.46379	0						229	-0.156033	2.96307
2011-08-18 23:30:00	2011-08-18 14:00:00	1534.78	947.14	230	-2.77445	1.97826						230	-2.26528	1.48693						229	-2.58281	0						230	-0.325978	2.94773
2011-08-19 23:30:00	2011-08-19 14:00:00	733.644	455.176	231	-2.81303	1.30617						231	-2.72636	0.883396						230	-2.74478	0						231	-1.15739	1.99381
2011-08-20 23:30:00	2011-08-20 14:00:00	1564.11	954.841	232	-1.84369	1.98443						232	-1.87955	1.49297						231	-2.61218	0.0558597						232	-0.299157	2.67293
2011-08-21 23:30:00	2011-08-21 14:00:00	1533.78	818.921	233	-2.41644	1.74414						233	-2.14969	1.30033						232	-2.21295	0.316662						233	-0.836631	2.24359
2011-08-22 23:30:00	2011-08-22 14:00:00	1375.22	853.334	234	-2.89242	1.83992						234	-2.29243	1.35678						233	-2.17409	0.488804						234	-1.04837	2.23842
2011-08-23 23:30:00	2011-08-23 14:00:00	1172	760.106	235	-3.47647	0.826463	0.43					235	-2.83485	0.607751	1.27		0.395851	0.082		234	-2.14312	0.750545	0.33		0.174805	0.037		235	-1.14961	1.99936	0.27		0.238414	0.05
2011-08-24 23:30:00	2011-08-24 14:00:00	528.578	521.365	236	-4.47202	0	0					236	-3.52873	0	0		0.0508495	0.009		235	-1.85006	0.927381						236	-1.61005	1.54686
2011-08-25 23:30:00	2011-08-25 14:00:00	1024.49	734.657	237	-4.722	0						237	-3.60273	0						236	-1.88297	0.950465						237	-1.64583	1.62289
2011-08-26 23:30:00	2011-08-26 14:00:00	1402.67	831.24	238	-4.85425	0						238	-3.72458	0						237	-1.71983	1.27383						238	-1.7627	1.60051
2011-08-27 23:30:00	2011-08-27 14:00:00	737.656	458.554	239	-4.60555	0						239	-3.6318	0						238	-1.57046	1.5699						239	-2.1387	1.06885
2011-08-28 23:30:00	2011-08-28 14:00:00	1149.78	670.139	240	-3.76341	0						240	-3.25541	0						239	-1.72704	1.26816						240	-1.51552	1.22528
2011-08-29 23:30:00	2011-08-29 14:00:00	879.411	481.627	241	-3.63693	0						241	-3.30981	0						240	-0.767679	1.78294						241	-1.74262	0.896725
2011-08-30 23:30:00	2011-08-30 14:00:00	892.956	539.304	242	-3.52532	0						242	-3.26608	0						241	-0.915213	1.60324						242	-1.73354	0.81962
2011-08-31 23:30:00	2011-08-31 14:00:00	1254.89	624.573	243	-3.60365	0						243	-3.31745	0						242	-0.677448	1.80409						243	-1.80543	0.762439
2011-09-01 23:30:00	2011-09-01 14:00:00	804.211	496.833	244	-3.66965	0.0587507						244	-3.39453	0.0901618						243	-0.442848	2.10178						244	-2.05878	0.55894
2011-09-02 23:30:00	2011-09-02 14:00:00	1277.11	834.441	245	-3.83585	0.345508						245	-3.17756	0.528969						244	-0.658638	1.99918						245	-2.24483	0.572184
2011-09-03 23:30:00	2011-09-03 14:00:00	1369.44	846.676	246	-3.74426	0.613103	0					246	-2.99489	0.938592	0		0.0293133	0.008		245	-0.202799	2.71902	0.15		0.0307851	0.008		246	-2.4512	0.427512	0.23		0.260881	0.06
2011-09-04 23:30:00	2011-09-04 14:00:00	1319.89	820.794	247	-3.8042	0.873464						247	-2.97942	1.33737						246	-0.203665	2.87857						247	-2.72522	0.280691
2011-09-05 23:30:00	2011-09-05 14:00:00	982.422	504.109	248	-3.93032	0.796351						248	-3.15994	1.22242						247	-0.338574	3.01748						248	-2.90015	0.102674
2011-09-06 23:30:00	2011-09-06 14:00:00	1299.78	808.504	249	-2.72984	1.37576						249	-1.91004	2.10657						248	-1.09657	2.28636						249	-2.04892	0.0050124
2011-09-07 23:30:00	2011-09-07 14:00:00	818.756	480.553	250	-2.63577	1.1514						250	-2.24188	1.76767						249	0.267025	3.27268						250	-1.26077	0
2011-09-08 23:30:00	2011-09-08 14:00:00	505.178	320.089	251	-2.32472	1.16285						251	-1.9496	1.78959						250	-0.429898	2.4611						251	-1.10088	0
2011-09-09 23:30:00	2011-09-09 14:00:00	748.333	407.643	252	-2.05601	1.48131						252	-1.57403	2.27653						251	-0.372614	2.2949						252	-1.11116	0
2011-09-10 23:30:00	2011-09-10 14:00:00	919.667	562.055	253	-2.32016	1.93378						253	-1.47774	2.9672						252	-0.101628	2.65564						253	-1.42007	0
2011-09-11 23:30:00	2011-09-11 14:00:00	1312.11	815.056	254	-2.08239	2.64						254	-0.914428	4.04214						253	-0.0995808	3.18171						254	-1.62537	0
2011-09-12 23:30:00	2011-09-12 14:00:00	835.756	591.048	255	-1.9506	2.55447						255	-0.78023	3.91802						254	0.305793	4.01113						255	-1.47905	0
2011-09-13 23:30:00	2011-09-13 14:00:00	1094.48	677.535	256	-1.5055	2.8817						256	-0.466045	4.4156						255	0.278942	3.73016						256	-1.42119	0
2011-09-14 23:30:00	2011-09-14 14:00:00	1011.63	683.812	257	-1.06721	3.07697						257	0.241976	4.71617						256	0.4203	3.98097						257	-1.27792	0
2011-09-15 23:30:00	2011-09-15 14:00:00	971.367	572.094	258	-1.10705	2.99007						258	0.129782	4.58667						257	0.870187	4.0846						258	-1.24046	0
2011-09-16 23:30:00	2011-09-16 14:00:00	577.756	398.085	259	-0.998385	2.76863						259	0.201881	4.25677						258	0.650539	3.84911						259	-1.07709	0
2011-09-17 23:30:00	2011-09-17 14:00:00	900.444	594.027	260	-0.371975	3.47342						260	0.914769	5.32688						259	0.674571	3.51276						260	-1.12851	0
2011-09-18 23:30:00	2011-09-18 14:00:00	538.811	317.652	261	-2.10751	2.27322						261	-1.47585	3.49603						260	1.02461	4.17997						261	-1.3052	0
2011-09-19 23:30:00	2011-09-19 14:00:00	404.656	261.286	262	-1.73456	2.35982						262	-0.898533	3.63541						261	-0.849877	2.72615						262	-1.1604	0
2011-09-20 23:30:00	2011-09-20 14:00:00	974.833	589.178	263	-0.420901	3.89735						263	1.18666	5.97707						262	-0.40962	2.79454						263	-1.23237	0
2011-09-21 23:30:00	2011-09-21 14:00:00	1159	683.071	264	0.36475	4.52903						264	2.22847	6.94018						263	0.933602	4.33687						264	-1.17069	0
2011-09-22 23:30:00	2011-09-22 14:00:00	646.978	354.19	265	-0.902466	3.31021						265	0.178642	5.0893						264	1.54374	4.89762						265	-1.1678	0
2011-09-23 23:30:00	2011-09-23 14:00:00	807.5	481.475	266	0.388695	4.26143						266	2.05869	6.54187						265	0.150976	3.61062						266	-1.02475	0
2011-09-24 23:30:00	2011-09-24 14:00:00	1176.11	721.144	267	1.48371	5.43174						267	3.77272	8.32115						266	1.401	4.50305						267	-1.04572	0
2011-09-25 23:30:00	2011-09-25 14:00:00	1155.78	686.091	268	1.41451	5.47432						268	3.66433	8.38807						267	2.37197	5.53633						268	-1.07426	0
2011-09-26 23:30:00	2011-09-26 14:00:00	1085.56	673.262	269	1.29005	5.5471	0.47					269	3.47195	8.50038	2.37		0.868091	0.162		268	2.19453	5.49935	0.37		0.551573	0.085		269	-1.14068	0	0		-0.00682369	0
2011-09-27 23:30:00	2011-09-27 14:00:00	561.644	343.965	270	-0.431536	3.81777						270	0.80334	5.82673						269	1.93881	5.5053						270	-1.12611	0
2011-09-28 23:30:00	2011-09-28 14:00:00	1156.33	710.771	271	-0.828906	2.78433						271	4.09972	8.68814						270	0.354171	3.91074						271	-1.03701	0
2011-09-29 23:30:00	2011-09-29 14:00:00	1066.11	698.657	272	-3.28049	0						272	3.11342	8.34518						271	2.39639	5.60609						272	-1.16791	0
2011-09-30 23:30:00	2011-09-30 14:00:00	1116.09	731.842	273	-3.15308	0						273	3.11699	8.54633						272	1.603	5.41796						273	-1.25013	0
2011-10-01 23:30:00	2011-10-01 14:00:00	1106.16	721.307	274	-3.1154	0						274	3.13362	8.4045						273	1.59111	5.55357						274	-1.23272	0
2011-10-02 23:30:00	2011-10-02 14:00:00	938.5	613.468	275	-3.08292	0						275	2.54668	7.45733						274	1.64929	5.50217						275	-1.16324	0
2011-10-03 23:30:00	2011-10-03 14:00:00	845.111	508.795	276	-3.04271	0						276	1.34326	6.60029						275	1.52642	5.01328						276	-1.19195	0
2011-10-04 23:30:00	2011-10-04 14:00:00	741.211	516.458	277	-3.19376	0						277	0.841493	6.63239						276	0.682036	4.59479						277	-1.3346	0
2011-10-05 23:30:00	2011-10-05 14:00:00	613.567	370.44	278	-3.16465	0						278	-0.30407	5.14208						277	0.33579	4.68976						278	-1.26004	0
2011-10-06 23:30:00	2011-10-06 14:00:00	1035.9	673.845	279	-3.11861	0	0					279	1.641	7.19521	1.86667		0.844785	0.165		278	-0.102888	3.86188	0		0.0139715	0.002		279	-1.2573	0	0		0.021	0.07
2011-10-07 23:30:00	2011-10-07 14:00:00	517.433	346.528	280	-2.6756	0						280	0.564051	4.74995						279	1.0305	5.05741						280	-0.88435	0
2011-10-08 23:30:00	2011-10-08 14:00:00	599.811	378.72	281	-2.39183	0						281	0.731972	4.55404						280	0.973759	3.83782						281	-0.755415	0
2011-10-09 23:30:00	2011-10-09 14:00:00	564.833	385.431	282	-2.32365	0						282	0.598328	4.49521						281	1.05078	3.70149						282	-0.748563	0
2011-10-10 23:30:00	2011-10-10 14:00:00	235.111	145.297	283	-2.15737	0.00437784						283	-1.98341	1.94711						282	1.07981	3.77673						283	-0.728712	0
2011-10-11 23:30:00	2011-10-11 14:00:00	213.878	159.596	284	-2.2595	0.0313981						284	-2.49835	2.01672						283	-0.891976	2.01802						284	-0.826213	0
2011-10-12 23:30:00	2011-10-12 14:00:00	782.122	539.644	285	-1.9419	0.132893						285	0.995813	5.05773						284	-1.09104	2.16505						285	-0.705508	0
2011-10-13 23:30:00	2011-10-13 14:00:00	589.933	404.035	286	-1.6547	0.16262						286	0.407802	3.97749						285	1.55697	4.44464						286	-0.586017	0
2011-10-14 23:30:00	2011-10-14 14:00:00	846.344	527.848	287	-1.41061	0.256632						287	1.61326	4.7449						286	1.25944	3.80793						287	-0.493162	0
2011-10-15 23:30:00	2011-10-15 14:00:00	853.167	575.063	288	-1.23246	0.337643						288	1.89294	4.84995						287	2.30286	4.50614						288	-0.445488	0
2011-10-16 23:30:00	2011-10-16 14:00:00	851.522	551.195	289	-1.02406	0.388411						289	1.67871	4.42523						288	2.68606	4.73493						289	-0.390557	0
2011-10-17 23:30:00	2011-10-17 14:00:00	840.033	560.838	290	-0.849813	0.442828	0.4					290	1.41922	4.08096	1.4		0.796127	0.14		289	2.59838	4.57846	0.4		0.0913744	0.011		290	-0.359295	0	0		0.0214841	0
2011-10-18 23:30:00	2011-10-18 14:00:00	776.222	499.432	291	-0.842694	0.467225						291	0.329567	3.4794						290	2.47278	4.50869						291	-0.383356	0
2011-10-19 23:30:00	2011-10-19 14:00:00	324.922	240.459	292	-1.06014	0.334383						292	-1.5901	1.83143						291	1.58601	4.2244						292	-0.348876	0
2011-10-20 23:30:00	2011-10-20 14:00:00	346.489	239.028	293	-0.887809	0.372426						293	-1.24235	1.74126						292	0.264919	2.86223						293	-0.277139	0
2011-10-21 23:30:00	2011-10-21 14:00:00	626.378	384.872	294	-0.629349	0.545762						294	-0.42153	2.40936						293	0.590801	2.81548						294	-0.261016	0
2011-10-22 23:30:00	2011-10-22 14:00:00	631.056	385.419	295	-0.544278	0.619626						295	-0.4281	2.40664						294	1.38466	3.54258						295	-0.251301	0
2011-10-23 23:30:00	2011-10-23 14:00:00	179.623	159.948	296	-0.68617	0.35186						296	-1.41005	0.996543						295	1.60699	3.62126						296	-0.198723	0
2011-10-24 23:30:00	2011-10-24 14:00:00	86.61	70.1284	297	-0.981195	0.182709						297	-2.56164	0.407428						296	0.203238	2.05646						297	-0.28281	0
2011-10-25 23:30:00	2011-10-25 14:00:00	637.933	421.784	298	-0.41221	0.811796	0.43					298	-1.14587	2.15826	0.866667		0.731748	0.085		297	-1.37225	1.05283	0.27		0.11012	0.01		298	-0.326072	0	0		0.0392069	0
2011-10-26 23:30:00	2011-10-26 14:00:00	330.478	197.037	299	-0.866656	0.473843						299	-2.99517	0.951593						298	1.08642	3.67697						299	-0.422459	0
2011-10-27 23:30:00	2011-10-27 14:00:00	246.333	205.121	300	-0.848216	0.512245						300	-3.39014	0.876446						299	-0.874421	2.15728						300	-0.449661	0
2011-10-28 23:30:00	2011-10-28 14:00:00	200.2	149.161	301	-0.819756	0.435456						301	-3.22247	0.600749						300	-0.802556	2.18643						301	-0.379644	0
2011-10-29 23:30:00	2011-10-29 14:00:00	374.844	233.944	302	-0.55737	0.70321						302	-3.09068	0.929869						301	-0.867421	1.81679						302	-0.403757	0
2011-10-30 23:30:00	2011-10-30 14:00:00	447.689	309.163	303	-0.322017	0.916692						303	-2.90177	1.08913						302	-0.118781	2.62563						303	-0.395185	0
2011-10-31 23:30:00	2011-10-31 14:00:00	255.222	182.33	304	-0.687049	0.601929						304	-3.69518	0.549983						303	0.440848	3.1681						304	-0.440228	0
2011-11-01	2011-11-01 14:00:00	609.889	421.868	305								305								304	-0.907777	2.06702						305
2011-11-02	2011-11-02 14:00:00	521.111	347.13	306								306								305	0.679012							306
2011-11-03	2011-11-03 14:00:00	400.222	280.868	307								307			0		0.049	0.002		306								307
2011-11-04	2011-11-04 14:00:00	564.167	360.87	308			0.3					308			0		0.0488926	0.002		307			0.366667		0.159105	0.012		308			0		0.0505704	0
2011-11-05	2011-11-05 14:00:00	427	300.263	309								309								308								309
2011-11-06	2011-11-06 14:00:00	547.989	387.653	310								310								309								310
2011-11-07	2011-11-07 14:00:00	526.211	368.699	311								311								310								311
2011-11-08	2011-11-08 14:00:00	532.722	354.754	312								312								311								312
2011-11-09	2011-11-09 14:00:00	193.478	125.985	313								313								312								313
2011-11-10	2011-11-10 14:00:00	380.789	301.707	314								314								313								314
2011-11-11	2011-11-11 14:00:00	407.856	321.089	315								315								314								315
2011-11-12	2011-11-12 14:00:00	498.178	347.833	316								316								315								316
2011-11-13	2011-11-13 14:00:00	446.3	306.478	317								317								316								317
2011-11-14	2011-11-14 14:00:00	154.673	125.536	318								318								317								318
2011-11-15	2011-11-15 14:00:00	54.2133	51.4033	319								319								318								319
2011-11-16	2011-11-16 14:00:00	132.487	95.7269	320								320								319								320
2011-11-17	2011-11-17 14:00:00	231.43	189.176	321								321								320								321
2011-11-18	2011-11-18 14:00:00	67.9522	53.8297	322								322								321								322
2011-11-19	2011-11-19 14:00:00	81.5522	67.394	323								323								322								323
2011-11-20	2011-11-20 14:00:00	264.444	186.306	324								324								323								324
2011-11-21	2011-11-21 14:00:00	398.444	278.916	325								325								324								325
2011-11-22	2011-11-22 14:00:00	388.222	275.853	326								326								325								326
2011-11-23	2011-11-23 14:00:00	87.1944	70.108	327								327								326								327
2011-11-24	2011-11-24 14:00:00	113.682	83.596	328								328								327								328
2011-11-25	2011-11-25 14:00:00	389.544	289.515	329								329								328								329
2011-11-26	2011-11-26 14:00:00	277.267	203.189	330								330								329								330
2011-11-27	2011-11-27 14:00:00	104.649	78.372	331								331								330								331
2011-11-28	2011-11-28 14:00:00	385.311	276.715	332								332								331								332
2011-11-29	2011-11-29 14:00:00	415.478	289.212	333								333								332								333
2011-11-30	2011-11-30 14:00:00	253.497	211.692	334								334								333								334
2011-12-01	2011-12-01 14:00:00	186.787	138.773	335								335								334								335
2011-12-02	2011-12-02 14:00:00	148.963	115.33	336								336								335								336
2011-12-03	2011-12-03 14:00:00	364.189	252.388	337								337								336								337
2011-12-04	2011-12-04 14:00:00	156.516	123.576	338								338								337								338
2011-12-05	2011-12-05 14:00:00	177.383	158.18	339								339								338								339
2011-12-06	2011-12-06 14:00:00	196.27	132.384	340								340								339								340
2011-12-07	2011-12-07 14:00:00	310.1	214.039	341								341								340								341
2011-12-08	2011-12-08 14:00:00	185.756	164.547	342								342								341								342
2011-12-09	2011-12-09 14:00:00	190.137	192.333	343								343								342								343
2011-12-10	2011-12-10 14:00:00	211.526	155.765	344								344								343								344
2011-12-11	2011-12-11 14:00:00	225.382	179.246	345								345								344								345
2011-12-12	2011-12-12 14:00:00	280.9	206.895	346								346								345								346
2011-12-13	2011-12-13 14:00:00	129.541	103.394	347								347								346								347
2011-12-14	2011-12-14 14:00:00	210.713	155.111	348								348								347								348
2011-12-15	2011-12-15 14:00:00	188.796	138.715	349								349								348								349
2011-12-16	2011-12-16 14:00:00	130.504	103.006	350								350								349								350
2011-12-17	2011-12-17 14:00:00	100.543	82.25	351								351								350								351
2011-12-18	2011-12-18 14:00:00	94.3744	80.4549	352								352								351								352
2011-12-19	2011-12-19 14:00:00	134.473	108.645	353								353								352								353
2011-12-20	2011-12-20 14:00:00	215.619	169.619	354								354								353								354
2011-12-21	2011-12-21 14:00:00	111.531	107.814	355								355								354								355
2011-12-22	2011-12-22 14:00:00	123.543	109.511	356								356								355								356
2011-12-23	2011-12-23 14:00:00	141.281	109.233	357								357								356								357
2011-12-24	2011-12-24 14:00:00	63.1411	58.5392	358								358								357								358
2011-12-25	2011-12-25 14:00:00	105.341	80.4006	359								359								358								359
2011-12-26	2011-12-26 14:00:00	67.4978	63.2657	360								360								359								360
2011-12-27	2011-12-27 14:00:00	50.0278	40.2186	361								361								360								361
2011-12-28	2011-12-28 14:00:00	52.0656	70.9567	362								362								361								362
2011-12-29	2011-12-29 14:00:00	192.979	156.457	363								363								362								363
2011-12-30	2011-12-30 14:00:00	97.66	85.3123	364								364								363								364
2011-12-31	2011-12-31 14:00:00	167.733	124.47	365								365								364								365
2012-01-01 23:30:00	2012-01-01 14:00:00	64.9378	53.9631	1	-0.40126	0.286079						1	-0.262577	0.387531						365								1	-1.04879	0
2012-01-02 23:30:00	2012-01-02 14:00:00	103.643	80.6826	2	-0.736868	0.440584						2	-0.708324	0.600666						1	-0.172184	0						2	-1.99609	0
2012-01-03 23:30:00	2012-01-03 14:00:00	337.711	257.71	3	0.306614	1.20077						3	0.716694	1.67423						2	-0.203811	0						3	-1.51863	0
2012-01-04 23:30:00	2012-01-04 14:00:00	182.214	132.735	4	-0.213635	0.695132						4	0.0975523	0.959062						3	-0.17916	0						4	-1.365	0
2012-01-05 23:30:00	2012-01-05 14:00:00	84.6744	75.8098	5	-0.352813	0.432548						5	-0.198206	0.591545						4	-0.175938	0						5	-1.24232	0
2012-01-06 23:30:00	2012-01-06 14:00:00	93.5389	89.0693	6	-0.260979	0.460826						6	-0.129555	0.630566						5	-0.171756	0						6	-1.19627	0
2012-01-07 23:30:00	2012-01-07 14:00:00	149.478	104.085	7	-0.176032	0.52507						7	0.0371823	0.722319						6	-0.17145	0						7	-1.05098	0
2012-01-08 23:30:00	2012-01-08 14:00:00	59.1678	57.5886	8	-0.56871	0.293252						8	-0.461906	0.399676						7	-0.175161	0						8	-1.32023	0
2012-01-09 23:30:00	2012-01-09 14:00:00	98.7833	83.5343	9	-0.354586	0.385548						9	-0.254481	0.52864						8	-0.192502	0						9	-1.21536	0
2012-01-10 23:30:00	2012-01-10 14:00:00	42.6267	35.8775	10	-0.651208	0.201608						10	-0.554423	0.274107						9	-0.185755	0						10	-1.23285	0
2012-01-11 23:30:00	2012-01-11 14:00:00	143.85	99.4393	11	-0.560768	0.414988						11	-0.367622	0.572859						10	-0.202098	0						11	-1.38927	0
2012-01-12 23:30:00	2012-01-12 14:00:00	50.0844	51.7843	12	-0.876712	0.226108						12	-0.774656	0.309064						11	-0.217455	0						12	-1.64423	0
2012-01-13 23:30:00	2012-01-13 14:00:00	144.931	152.793	13	-0.182414	0.586826						13	0.0735601	0.813792						12	-0.231389	0						13	-1.02146	0
2012-01-14 23:30:00	2012-01-14 14:00:00	141.797	138.206	14	-0.14532	0.53546						14	0.0972113	0.741433						13	-0.207922	0						14	-0.804976	0
2012-01-15 23:30:00	2012-01-15 14:00:00	311.27	235.977	15	0.114577	0.704903						15	0.407722	0.982919						14	-0.203245	0						15	-0.72081	0
2012-01-16 23:30:00	2012-01-16 14:00:00	105.752	88.83	16	-0.26449	0.312799						16	-0.130412	0.432195						15	-0.193005	0						16	-0.680301	0
2012-01-17 23:30:00	2012-01-17 14:00:00	57.3856	55.3867	17	-0.488641	0.19941						17	-0.392116	0.274787						16	-0.193209	0						17	-0.683661	0
2012-01-18 23:30:00	2012-01-18 14:00:00	136.699	153.485	18	-0.24712	0.456185						18	-0.058997	0.634411						17	-0.218948	0						18	-0.69504	0
2012-01-19 23:30:00	2012-01-19 14:00:00	55.8956	45.462	19	-0.628631	0.147574						19	-0.582409	0.204066						18	-0.223859	0						19	-0.775565	0
2012-01-20 23:30:00	2012-01-20 14:00:00	72.0478	69.2412	20	-0.551736	0.212569						20	-0.481522	0.295244						19	-0.238074	0						20	-0.788449	0
2012-01-21 23:30:00	2012-01-21 14:00:00	84.4778	74.9093	21	-0.56932	0.186411						21	-0.518407	0.259623						20	-0.235553	0						21	-0.75081	0
2012-01-22 23:30:00	2012-01-22 14:00:00	109.748	96.7588	22	-0.65165	0.240401						22	-0.622816	0.335811						21	-0.238886	0						22	-0.966893	0
2012-01-23 23:30:00	2012-01-23 14:00:00	389.978	276.338	23	-0.267531	0.502558						23	-0.0930682	0.699682						22	-0.261991	0						23	-0.775419	0
2012-01-24 23:30:00	2012-01-24 14:00:00	291.589	221.087	24	-0.282119	0.425208						24	-0.120347	0.593343						23	-0.241129	0						24	-0.642834	0
2012-01-25 23:30:00	2012-01-25 14:00:00	196.323	174.058	25	-0.438939	0.2778						25	-0.337962	0.388522						24	-0.231768	0						25	-0.629352	0
2012-01-26 23:30:00	2012-01-26 14:00:00	368.533	270.843	26	-0.336915	0.367458						26	-0.173141	0.509795						25	-0.234177	0						26	-0.600321	0
2012-01-27 23:30:00	2012-01-27 14:00:00	431.789	313.179	27	-0.234023	0.377783						27	0.0231598	0.520595						26	-0.22799	0						27	-0.450777	0
2012-01-28 23:30:00	2012-01-28 14:00:00	250.289	193.663	28	-0.323937	0.236557						28	-0.0877446	0.331296						27	-0.19457	0						28	-0.332516	0
2012-01-29 23:30:00	2012-01-29 14:00:00	425.8	323.227	29	-0.274189	0.283264						29	-0.0901891	0.384721						28	-0.180971	0						29	-0.279642	0
2012-01-30 23:30:00	2012-01-30 14:00:00	454.4	343.252	30	-0.262835	0.241072	0.0666667					30	-0.0605755	0.321617	0.0666667		0.637356	0.036		29	-0.192878	0	0		0.0234431	0.002		30	-0.194055	0	0		0.0225563	0
2012-01-31 23:30:00	2012-01-31 14:00:00	474.378	359.952	31	-0.306457	0.19188						31	-0.119873	0.246841						30	-0.173174	0						31	-0.165166	0
2012-02-01 23:30:00	2012-02-01 14:00:00	467.722	356.333	32	-0.331792	0.134427						32	-0.0951459	0.159126						31	-0.169487	0						32	-0.116861	0
2012-02-02 23:30:00	2012-02-02 14:00:00	490.356	371.767	33	-0.362134	0.0822682						33	-0.117179	0.0633578						32	-0.141959	0						33	-0.0901133	0
2012-02-03 23:30:00	2012-02-03 14:00:00	360.967	263.148	34	-0.372449	0.071301						34	-0.0837726	0.0943193						33	-0.119977	0						34	-0.114277	0
2012-02-04 23:30:00	2012-02-04 14:00:00	284.856	239.458	35	-0.335619	0.0798279						35	0.0262897	0.140475						34	-0.119018	0						35	-0.129464	0
2012-02-05 23:30:00	2012-02-05 14:00:00	454.844	341.979	36	-0.31788	0.106405						36	0.0961994	0.195703						35	-0.0947001	0						36	-0.192152	0
2012-02-06 23:30:00	2012-02-06 14:00:00	490.185	387.565	37	-0.200768	0.117313						37	0.218375	0.24605						36	-0.0839394	0						37	-0.128407	0
2012-02-07 23:30:00	2012-02-07 14:00:00	248.717	205.901	38	-0.23599	0.0798814						38	0.145796	0.220655						37	-0.0463048	0						38	-0.146908	0
2012-02-08 23:30:00	2012-02-08 14:00:00	485.411	412.792	39	-0.20498	0.13108						39	0.19923	0.334197						38	-0.0745326	0						39	-0.192823	0
2012-02-09 23:30:00	2012-02-09 14:00:00	278.84	307.758	40	-0.223201	0.102003						40	0.179896	0.299669						39	-0.0994569	0						40	-0.237068	0
2012-02-10 23:30:00	2012-02-10 14:00:00	510.027	439.541	41	-0.0739087	0.157535						41	0.434545	0.458951						40	-0.0902442	0						41	-0.197711	0
2012-02-11 23:30:00	2012-02-11 14:00:00	538.482	457.941	42	-0.0147707	0.167179						42	0.498645	0.514081						41	-0.0410465	0						42	-0.163489	0
2012-02-12 23:30:00	2012-02-12 14:00:00	550.213	442.874	43	0.00674255	0.17752						43	0.537635	0.577283						42	-0.0296497	0						43	-0.143394	0
2012-02-13 23:30:00	2012-02-13 14:00:00	326.696	269.123	44	-0.122048	0.128751						44	0.364979	0.48467						43	-0.044009	0						44	-0.244509	0
2012-02-14 23:30:00	2012-02-14 14:00:00	480.294	410.809	45	-0.0909738	0.173492						45	0.486413	0.631548						44	-0.0895846	0						45	-0.306242	0
2012-02-15 23:30:00	2012-02-15 14:00:00	342.234	289.849	46	-0.209962	0.151864						46	0.248569	0.612836						45	-0.0988322	0						46	-0.36557	0
2012-02-16 23:30:00	2012-02-16 14:00:00	418.029	376.053	47	-0.134325	0.1881						47	0.457849	0.753576						46	-0.153345	0						47	-0.402076	0
2012-02-17 23:30:00	2012-02-17 14:00:00	311.127	281.232	48	-0.253688	0.148661						48	0.0955528	0.646789						47	-0.13539	0						48	-0.424368	0
2012-02-18 23:30:00	2012-02-18 14:00:00	470.83	372.727	49	-0.227671	0.192988						49	0.197598	0.827503						48	-0.181149	0						49	-0.469201	0
2012-02-19 23:30:00	2012-02-19 14:00:00	147.654	165.017	50	-0.304946	0.112729						50	-0.110354	0.555321						49	-0.193685	0						50	-0.473669	0
2012-02-20 23:30:00	2012-02-20 14:00:00	325.23	378.009	51	-0.116898	0.20042						51	0.526722	0.927601						50	-0.196242	0						51	-0.474756	0
2012-02-21 23:30:00	2012-02-21 14:00:00	224.009	198.886	52	-0.158135	0.121548						52	0.387168	0.65954						51	-0.152742	0						52	-0.460282	0
2012-02-22 23:30:00	2012-02-22 14:00:00	338.467	336.212	53	-0.116331	0.195947						53	0.79589	1.09359						52	-0.127762	0						53	-0.509108	0
2012-02-23 23:30:00	2012-02-23 14:00:00	109.518	251.343	54	-0.401829	0.148453						54	-0.181205	0.87182						53	-0.135296	0						54	-0.725288	0
2012-02-24 23:30:00	2012-02-24 14:00:00	327.809	239.486	55	-0.737993	0.169108						55	-1.68062	1.01846						54	-0.237865	0						55	-1.52355	0
2012-02-25 23:30:00	2012-02-25 14:00:00	360.902	249.543	56	-0.440295	0.224426						56	0.194894	1.37693						55	-0.389888	0						56	-0.894761	0
2012-02-26 23:30:00	2012-02-26 14:00:00	710.059	546.582	57	-0.192938	0.356168						57	1.67715	2.33182						56	-0.260569	0						57	-0.670102	0
2012-02-27 23:30:00	2012-02-27 14:00:00	745.42	508.42	58	-0.134233	0.339335						58	1.84176	2.25631						57	-0.196973	0						58	-0.474926	0
2012-02-28 23:30:00	2012-02-28 14:00:00	171.595	144.237	59	-0.594474	0.127251						59	-0.428294	0.761929						58	-0.157472	0						59	-0.804952	0
2012-02-29 23:30:00	2012-02-29 14:00:00	238.234	188.531	60	-0.79929	0.197224						60	-0.79891	1.21215						59	-0.257007	0						60	-1.48518	0
2012-03-01 23:30:00	2012-03-01 14:00:00	221.781	175.551	61	-0.888632	0.179023						61	-1.08297	1.0939						60	-0.357018	0						61	-1.57056	0
2012-03-02 23:30:00	2012-03-02 14:00:00	171.526	207.088	62	-0.745053	0.228466						62	-0.105958	1.41979						61	-0.376331	0						62	-1.16073	0
2012-03-03 23:30:00	2012-03-03 14:00:00	847.471	614.121	63	-0.371976	0.452249						63	2.39345	3.30274						62	-0.311435	0						63	-0.724223	0
2012-03-04 23:30:00	2012-03-04 14:00:00	600.879	431.863	64	-0.386392	0.388266						64	2.1313	2.70443						63	-0.237432	0						64	-0.509914	0
2012-03-05 23:30:00	2012-03-05 14:00:00	853.8	625.782	65	-0.342708	0.474165						65	2.92831	3.5343						64	-0.19967	0						65	-0.474944	0
2012-03-06 23:30:00	2012-03-06 14:00:00	865.607	628.287	66	-0.355293	0.483474						66	3.14213	3.63257						65	-0.201456	0						66	-0.423136	0
2012-03-07 23:30:00	2012-03-07 14:00:00	843.124	594.655	67	-0.417662	0.490483						67	3.10165	3.69453						66	-0.193929	0						67	-0.430265	0
2012-03-08 23:30:00	2012-03-08 14:00:00	230.975	194.372	68	-0.731721	0.269162						68	0.924981	1.66075						67	-0.204626	0						68	-0.449824	0
2012-03-09 23:30:00	2012-03-09 14:00:00	516.109	451.551	69	-0.721249	0.433279						69	1.83861	3.14338						68	-0.221666	0						69	-0.677026	0
2012-03-10 23:30:00	2012-03-10 14:00:00	312.344	231.478	70	-1.05682	0.292361						70	0.165206	1.86199						69	-0.272203	0						70	-0.94649	0
2012-03-11 23:30:00	2012-03-11 14:00:00	1122.46	760.38	71	-0.971341	0.551177						71	2.58818	4.52893						70	-0.338796	0						71	-1.18464	0
2012-03-12 23:30:00	2012-03-12 14:00:00	267.7	192.55	72	-1.27455	0.283025						72	-0.137199	1.75975						71	-0.393176	0						72	-1.06996	0
2012-03-13 23:30:00	2012-03-13 14:00:00	314.011	221.459	73	-1.36396	0.309661						73	-0.108943	1.98673						72	-0.386986	0						73	-1.18612	0
2012-03-14 23:30:00	2012-03-14 14:00:00	301.367	184.591	74	-1.48683	0.243786						74	-0.457004	1.57604						73	-0.419539	0						74	-1.0938	0
2012-03-15 23:30:00	2012-03-15 14:00:00	686.522	396.193	75	-1.36004	0.415784						75	1.21178	3.10274						74	-0.418288	0						75	-0.972612	0
2012-03-16	2012-03-16 14:00:00	1099.56	703.353	76	-1.29869	0.582114	0.0333333					76	2.60098	4.965	0.666667		0.714651	0.147		75	-0.414841	0	0		0.0502695	0.008		76	-1.34417	0	0		0.0355623	0.01
2012-03-17	2012-03-17	1099.56	703.353	77	-1.26593	0.647425						77	2.45376	5.08996						76	-0.469631	0						77	-1.46329	0
2012-03-18	2012-03-18	1099.56	703.353	78	-1.20528	0.713175						78	2.51451	5.21558						77	-0.517693	0						78	-1.46882	0
2012-03-19	2012-03-19	1084.29	671.725	79	-1.19943	0.740981						79	2.67465	5.07509						78	-0.554177	0						79	-1.22106	0
2012-03-20 23:30:00	2012-03-20 14:00:00	906.322	572.169	80	-1.24291	0.673187						80	1.65506	4.19865						79	-0.605186	0						80	-1.24475	0
2012-03-21 23:30:00	2012-03-21 14:00:00	592.7	350.977	81	-1.42235	0.579719						81	0.139986	3.24083						80	-0.607641	0						81	-1.57778	0
2012-03-22 23:30:00	2012-03-22 14:00:00	1178.44	729.027	82	-1.13741	0.929418						82	2.23251	5.46005						81	-0.717277	0						82	-1.69954	0
2012-03-23 23:30:00	2012-03-23 14:00:00	1314.22	828.074	83	-0.950408	1.10686						83	3.13026	6.33918						82	-0.818651	0						83	-1.65035	0
2012-03-24 23:30:00	2012-03-24 14:00:00	1215.22	780.224	84	-0.91242	1.14777						84	3.03991	6.26672						83	-0.851808	0						84	-1.59359	0
2012-03-25 23:30:00	2012-03-25 14:00:00	1222.41	721.804	85	-0.969499	1.05985						85	2.70937	5.56603						84	-0.887847	0						85	-1.3423	0
2012-03-26 23:30:00	2012-03-26 14:00:00	1225.11	821.8	86	-0.627802	1.32654						86	4.0321	6.78083						85	-0.879243	0						86	-1.19718	0
2012-03-27 23:30:00	2012-03-27 14:00:00	949	655.687	87	-0.781293	1.23465						87	2.66203	5.98621						86	-0.843356	0						87	-1.37179	0
2012-03-28 23:30:00	2012-03-28 14:00:00	1326.33	807.375	88	-0.696706	1.46103	0.0333333					88	2.77511	7.04627	2.53333		0.883055	0.212		87	-0.939869	0	0		0.0143807	0.003		88	-1.75007	0	0		0.0167474	0
2012-03-29 23:30:00	2012-03-29 14:00:00	322.411	236.663	89	-1.31784	0.713304						89	0.0213811	3.0223						88	-1.14129	0						89	-1.22452	0
2012-03-30 23:30:00	2012-03-30 14:00:00	788.389	404.46	90	-0.917812	1.04492						90	1.75998	4.55787						89	-1.00481	0						90	-1.07466	0
2012-03-31 23:30:00	2012-03-31 14:00:00	534.911	383.698	91	-0.819278	1.09839						91	2.2499	4.65149						90	-0.96993	0						91	-0.940654	0
2012-04-01 23:30:00	2012-04-01 14:00:00	1140.89	670.033	92	-0.29894	1.58203						92	4.38984	6.82432						91	-0.947778	0						92	-0.895953	0
2012-04-02 23:30:00	2012-04-02 14:00:00	685.156	486.82	93	-0.52374	1.39654						93	3.15595	5.76562						92	-0.951084	0						93	-0.932417	0
2012-04-03 23:30:00	2012-04-03 14:00:00	729.722	464.277	94	-0.591243	1.39673						94	2.53449	5.63791						93	-1.01459	0						94	-1.03479	0
2012-04-04 23:30:00	2012-04-04 14:00:00	181.322	116.526	95	-1.40541	0.494384						95	-0.637092	1.84543						94	-1.13291	0						95	-0.866566	0
2012-04-05 23:30:00	2012-04-05 14:00:00	564.544	436.374	96	-0.407931	1.49329						96	3.38876	5.78916						95	-1.05071	0						96	-0.836769	0
2012-04-06 23:30:00	2012-04-06 14:00:00	1343.67	758.954	97	0.105842	2.10028						97	5.43265	8.23156						96	-1.08715	0						97	-0.931341	0
2012-04-07 23:30:00	2012-04-07 14:00:00	382.011	313.491	98	-0.679489	1.19627						98	2.09215	4.44348						97	-1.24872	0						98	-0.78435	0
2012-04-08 23:30:00	2012-04-08 14:00:00	1214.86	701.836	99	0.456683	2.23359						99	6.43425	8.43383						98	-1.11709	0						99	-0.677873	0
2012-04-09 23:30:00	2012-04-09 14:00:00	1444.33	844.697	100	0.659564	2.48932						100	6.57834	9.28693						99	-1.0465	0						100	-0.733563	0
2012-04-10 23:30:00	2012-04-10 14:00:00	743.611	486.458	101	-0.128227	1.86853						101	2.71337	6.77339						100	-1.13558	0						101	-0.880704	0
2012-04-11 23:30:00	2012-04-11 14:00:00	948.922	603.411	102	0.0506816	2.21433						102	3.37918	7.95486						101	-1.3566	0						102	-0.96129	0
2012-04-12 23:30:00	2012-04-12 14:00:00	282.856	185.238	103	-1.1536	0.907645						103	-0.37419	3.1447						102	-1.58284	0.0249326						103	-0.822639	0
2012-04-13 23:30:00	2012-04-13 14:00:00	895.933	464.398	104	-0.108456	1.94401						104	3.39336	6.77281						103	-1.46574	0.0378994						104	-0.768895	0
2012-04-14 23:30:00	2012-04-14 14:00:00	1212.62	690.779	105	0.439677	2.53679						105	5.3876	8.75639						104	-1.37121	0.1563						105	-0.743522	0
2012-04-15 23:30:00	2012-04-15 14:00:00	488.467	324.691	106	-0.480907	1.58919						106	1.44354	5.39398						105	-1.32968	0.296152						106	-0.715014	0
2012-04-16 23:30:00	2012-04-16 14:00:00	419.067	269.903	107	-0.487803	1.47961						107	1.52186	4.95752						106	-1.39645	0.215963						107	-0.63061	0
2012-04-17 23:30:00	2012-04-17 14:00:00	1194	775.097	108	1.12081	3.11859						108	7.29424	10.3353						107	-1.2706	0.24238						108	-0.586515	0
2012-04-18 23:30:00	2012-04-18 14:00:00	991.333	607.757	109	0.825334	2.94368						109	5.12054	8.91808						108	-0.909157	0.657429						109	-0.647741	0
2012-04-19 23:30:00	2012-04-19 14:00:00	1449.22	821.537	110	1.32473	3.91525						110	5.66553	10.9194						109	-0.749889	0.888952						110	-0.821108	0
2012-04-20 23:30:00	2012-04-20 14:00:00	1098.07	617.591	111	0.632291	3.50635						111	3.36254	9.07692						110	-0.639166	1.5044						111	-0.925422	0
2012-04-21 23:30:00	2012-04-21 14:00:00	820.489	504.387	112	0.573781	3.60417						112	2.88655	8.73563						111	-0.837104	1.56825						112	-0.991397	0
2012-04-22 23:30:00	2012-04-22 14:00:00	875.222	513.152	113	1.0516	4.06865						113	4.10186	9.3142						112	-0.699116	1.80487						113	-0.990915	0
2012-04-23 23:30:00	2012-04-23 14:00:00	1326.56	749.131	114	1.93639	5.25329						114	6.02594	11.5097						113	-0.185751	2.22059						114	-1.08147	0
2012-04-24 23:30:00	2012-04-24 14:00:00	1027.33	682.976	115	2.01246	5.59942						115	4.74004	11.6677						114	0.377479	3.0465						115	-1.20191	0
2012-04-25 23:30:00	2012-04-25 14:00:00	1059.87	576.072	116	1.3518	5.02882						116	3.85858	9.9875						115	0.507674	3.44365						116	-1.23472	0
2012-04-26 23:30:00	2012-04-26 14:00:00	1474.67	886.729	117	3.24759	7.43247	0.666667		0.41401	0.097	-0.195	117	5.92413	14.3465	4.5		0.899906	0.312	-0.19	116	0.302034	3.25495	0.133333		0.162302	0.043	-0.198	117	-1.40632	0	0		0.0225685	0	-0.191
2012-04-27 23:30:00	2012-04-27 14:00:00	1637.67	967.276	118	2.99023	8.02221						118	5.01057	14.9444						117	1.43205	4.94406						118	-1.6403	0
2012-04-28 23:30:00	2012-04-28 14:00:00	1658	976.472	119	3.03368	8.79739						119	4.20302	15.852						118	1.16228	5.51147						119	-1.8473	0
2012-04-29 23:30:00	2012-04-29 14:00:00	1430.44	907.987	120	2.69505	8.75061						120	3.48743	15.2305						119	1.12809	6.21682						120	-1.92313	0
2012-04-30 23:30:00	2012-04-30 14:00:00	1653.33	968.724	121	3.19743	9.67025						121	5.58551	16.3776						120	1.03144	6.35957						121	-1.99262	0
2012-05-01 23:30:00	2012-05-01 14:00:00	1433	899.493	122	2.70926	9.54647						122	4.43136	15.6659						121	1.65379	7.17088						122	-2.07932	0
2012-05-02 23:30:00	2012-05-02 14:00:00	1611.89	896.954	123	2.81167	9.89272						123	5.28211	15.8408						122	1.41589	7.24396						123	-2.11699	0
2012-05-03 23:30:00	2012-05-03 14:00:00	492.592	426.099	124	-0.780179	5.83361						124	-0.707146	8.92403						123	1.75721	7.63044						124	-2.05282	0
2012-05-04 23:30:00	2012-05-04 14:00:00	988.3	600.813	125	1.59465	8.29654						125	3.02988	12.4445						124	-0.824557	4.66002						125	-2.07955	0
2012-05-05 23:30:00	2012-05-05 14:00:00	1510.22	802.675	126	2.53797	9.34891						126	4.9759	13.9335						125	1.21311	6.68881						126	-2.09367	0
2012-05-06 23:30:00	2012-05-06 14:00:00	269.544	216.024	127	-0.792071	4.54462						127	0.541292	6.27685						126	2.06721	7.54098						127	-1.78935	0
2012-05-07 23:30:00	2012-05-07 14:00:00	1439.67	770.342	128	4.5884	10.7076						128	8.09503	15.2261						127	-0.0972743	3.89136						128	-1.97409	0
2012-05-08 23:30:00	2012-05-08 14:00:00	1508.78	857.292	129	6.3334	12.8252						129	9.95262	17.8789						128	4.13109	8.87462						129	-1.9857	0.0983564
2012-05-09 23:30:00	2012-05-09 14:00:00	1385	769.608	130	4.89082	12.215						130	6.93583	16.6629						129	5.52121	10.7391						130	-1.90501	0.384683
2012-05-10 23:30:00	2012-05-10 14:00:00	1528.22	847.182	131	4.11428	12.9862						131	5.86168	17.449						130	4.07103	10.3506						131	-1.87929	0.690034
2012-05-11 23:30:00	2012-05-11 14:00:00	1462.67	795.193	132	2.72755	12.9236						132	3.87058	17.0106						131	3.47879	11.0783						132	-1.82726	0.969176
2012-05-12 23:30:00	2012-05-12 14:00:00	1290.3	767.401	133	4.73019	13.0065						133	8.41757	16.7976						132	2.39646	11.1389						133	-1.17684	1.2462
2012-05-13 23:30:00	2012-05-13 14:00:00	577.156	493.578	134	3.8961	10.5811						134	6.04075	13.1384						133	5.37583	11.319						134	-0.877676	1.33742
2012-05-14 23:30:00	2012-05-14 14:00:00	702.989	666.029	135	6.85318	13.946						135	9.19088	17.265						134	4.27898	9.43818						135	-0.418817	1.91773
2012-05-15 23:30:00	2012-05-15 14:00:00	811.3	456.664	136	3.22305	10.4024						136	4.49271	12.9139						135	6.48447	12.3878						136	-0.639423	1.76916
2012-05-16 23:30:00	2012-05-16 14:00:00	715.389	467.683	137	4.28711	11.0536						137	6.16859	14.007						136	3.08509	9.12258						137	-0.29975	2.07359
2012-05-17 23:30:00	2012-05-17 14:00:00	1051.8	712	138	8.84633	15.2956	1.63333		0.840461	0.301	-0.181	138	13.0997	20.2777	5		0.868423	0.314	-0.188	137	3.88137	9.42077	4.03333		0.838595	0.383	-0.204	138	0.575246	2.9069	0.166667		0.173682	0.07	-0.203
2012-05-18 23:30:00	2012-05-18 14:00:00	1325.56	850.786	139	9.07445	16.4708						139	14.2367	22.6716						138	7.59323	12.6138						139	0.752618	3.29047
2012-05-19 23:30:00	2012-05-19 14:00:00	1726.44	987.355	140	9.17309	18.3656						140	15.7777	26.2452						139	7.41519	13.2165						140	0.970775	3.85824
2012-05-20 23:30:00	2012-05-20 14:00:00	1735.67	998.883	141	8.28845	18.7434						141	15.0259	27.2806						140	7.35668	14.3646						141	1.0671	4.22698
2012-05-21 23:30:00	2012-05-21 14:00:00	1434.56	835.675	142	5.59585	16.7518						142	10.4894	24.1096						141	6.34206	14.3297						142	0.824979	4.1925
2012-05-22 23:30:00	2012-05-22 14:00:00	1710.11	960.148	143	6.2828	18.5533						143	12.6759	27.7659						142	3.91775	12.5269						143	1.17675	4.77974
2012-05-23 23:30:00	2012-05-23 14:00:00	1758.22	921.503	144	5.57304	17.9976						144	11.9509	27.1957						143	4.08469	13.548						144	1.27665	4.9611
2012-05-24 23:30:00	2012-05-24 14:00:00	1757.89	1002.21	145	8.5326	20.1585						145	18.6511	31.121						144	3.35526	12.8402						145	2.23634	5.72081
2012-05-25 23:30:00	2012-05-25 14:00:00	1738.78	996.211	146	9.31006	20.3333						146	19.9891	31.6525						145	5.9091	14.0456						146	2.6445	6.06417
2012-05-26 23:30:00	2012-05-26 14:00:00	1578.78	877.522	147	7.85618	18.7282						147	16.0311	28.093						146	6.25802	13.8554						147	2.45456	5.96628
2012-05-27 23:30:00	2012-05-27 14:00:00	1777.11	943.095	148	7.43821	18.8779						148	14.7384	28.0373						147	5.15775	12.7551						148	2.46049	6.19756
2012-05-28 23:30:00	2012-05-28 14:00:00	1752.56	985.35	149	8.88243	20.2373	3.1		0.811674	0.314	-0.171	149	16.4431	29.4638	4.63333		0.76154	0.301	-0.167	148	4.69167	12.9152	3.13333		0.798894	0.368	-0.211	149	3.09961	6.88612	0.766667		0.524706	0.2	-0.185
2012-05-29 23:30:00	2012-05-29 14:00:00	1511.56	798.42	150	7.06623	18.0349						150	11.5174	24.7394						149	5.8654	13.8895						150	2.84003	6.69593
2012-05-30 23:30:00	2012-05-30 14:00:00	869.4	522.286	151	4.20579	13.9196						151	6.52284	17.5608						150	4.4742	12.3498						151	2.11602	5.80459
2012-05-31 23:30:00	2012-05-31 14:00:00	1379.22	768.027	152	7.95065	17.2306						152	11.384	22.6449						151	2.83969	9.46981						152	3.08853	6.83675
2012-06-01 23:30:00	2012-06-01 14:00:00	871.889	480.18	153	3.66877	12.1486						153	4.40336	14.654						152	5.15745	11.8611						153	1.80869	5.50107
2012-06-02 23:30:00	2012-06-02 14:00:00	1231.88	810.717	154	11.1591	18.6134						154	14.2404	23.1538						153	2.20045	8.29949						154	4.37346	7.94857
2012-06-03 23:30:00	2012-06-03 14:00:00	1157.11	639.61	155	7.19951	15.0241						155	8.37267	17.8242						154	7.40348	12.8546						155	3.15775	6.90019
2012-06-04 23:30:00	2012-06-04 14:00:00	694.133	351.474	156	2.39468	9.89718						156	1.52228	10.5577						155	4.49212	10.3532						156	1.59841	5.3796
2012-06-05 23:30:00	2012-06-05 14:00:00	344.978	231.626	157	0.147146	6.9715						157	-1.14329	7.01511						156	1.09871	6.73355						157	0.444527	4.17245
2012-06-06 23:30:00	2012-06-06 14:00:00	744.067	574.079	158	7.51509	14.9715						158	6.95788	15.884						157	-0.63114	4.72021						158	3.98592	7.91139
2012-06-07 23:30:00	2012-06-07 14:00:00	1191.89	669.472	159	5.79864	14.8864						159	5.0096	15.9419						158	4.30253	10.3057						159	3.42806	7.715
2012-06-08 23:30:00	2012-06-08 14:00:00	1414	670.303	160	4.46966	14.8149						160	3.28045	15.5251						159	3.07316	10.3386						160	3.39551	7.9257
2012-06-09 23:30:00	2012-06-09 14:00:00	1149	657.136	161	5.68439	15.5158						161	3.76842	15.5273						160	2.13555	10.3195						161	4.14849	8.72006
2012-06-10 23:30:00	2012-06-10 14:00:00	1302.78	681.664	162	5.69244	14.9702						162	3.57614	14.7925						161	3.05443	10.7932						162	3.8147	8.41098
2012-06-11 23:30:00	2012-06-11 14:00:00	1233.06	592.962	163	4.66733	13.8621						163	2.0624	13.0014						162	3.08205	10.4681						163	3.68829	8.34845
2012-06-12 23:30:00	2012-06-12 14:00:00	1569.89	919.925	164	8.82957	18.3524						164	6.12149	17.5407						163	2.25395	9.66379						164	5.48736	10.2744
2012-06-13 23:30:00	2012-06-13 14:00:00	1229.9	649.778	165	5.21854	14.5306						165	1.68338	12.8512						164	5.36359	12.9809						165	4.18341	9.04621
2012-06-14 23:30:00	2012-06-14 14:00:00	671.167	366.124	166	1.02023	8.77842						166	-2.44854	6.94355						165	2.58407	10.1915						166	1.66301	6.42256
2012-06-15 23:30:00	2012-06-15 14:00:00	1666.11	931.259	167	9.93255	18.6823	3.33333		0.750107	0.245	-0.183	167	5.95126	15.8902	4.23333		0.740178	0.299	-0.159	166	-0.611469	6.06463	2.5		0.738971	0.324	-0.219	167	6.58478	11.4835	2.5		0.883551	0.49	-0.196
2012-06-16 23:30:00	2012-06-16 14:00:00	1673.67	932.542	168	7.22092	18.68						168	3.07637	15.1401						167	5.85988	13.2696						168	6.63858	11.8413
2012-06-17 23:30:00	2012-06-17 14:00:00	735.622	645.599	169	5.27483	14.9899						169	0.0200562	10.8162						168	4.25373	13.2803						169	5.66461	10.848
2012-06-18 23:30:00	2012-06-18 14:00:00	1714.33	909.849	170	6.43335	18.0259						170	2.0395	13.1338						169	2.406	10.515						170	6.94275	12.2235
2012-06-19 23:30:00	2012-06-19 14:00:00	1245.44	817.557	171	7.78249	17.5126						171	0.914076	11.7279						170	3.70489	12.8328						171	7.30106	12.6556
2012-06-20 23:30:00	2012-06-20 14:00:00	385.767	203.436	172	-3.48505	4.8619						172	-6.1849	2.80123						171	4.13862	12.3929						172	-0.311155	4.88099
2012-06-21 23:30:00	2012-06-21 14:00:00	236.489	190.067	173	-3.54455	4.41178						173	-5.76971	2.55723						172	-4.21293	3.29506						173	-0.581646	4.51912
2012-06-22 23:30:00	2012-06-22 14:00:00	540.433	535.47	174	1.55349	11.1698						174	-2.06303	7.17742						173	-4.26586	2.96995						174	4.06248	9.33604
2012-06-23 23:30:00	2012-06-23 14:00:00	1358.67	829.321	175	6.07473	16.0173						175	0.98226	10.7945						174	-0.457768	7.57857						175	6.85729	12.2568
2012-06-24 23:30:00	2012-06-24 14:00:00	1537.11	845.328	176	4.91631	15.1272						176	0.190543	10.3025						175	2.65934	10.8122						176	6.14981	11.6509
2012-06-25 23:30:00	2012-06-25 14:00:00	702.633	543.32	177	2.74902	10.9358						177	-2.26145	7.04506						176	1.86572	10.0741						177	4.43856	9.67386
2012-06-26 23:30:00	2012-06-26 14:00:00	415.7	330.025	178	-1.00617	6.75118						178	-4.51421	4.13113						177	-0.070208	7.15793						178	2.03102	7.03182
2012-06-27 23:30:00	2012-06-27 14:00:00	1408.56	714.149	179	3.77821	12.1894						179	-0.909133	8.20432						178	-2.52468	4.3622						179	5.09314	10.2622
2012-06-28 23:30:00	2012-06-28 14:00:00	637.956	500.4	180	0.525217	9.42845						180	-3.33049	6.06424						179	0.535137	7.73278						180	3.85389	9.15333
2012-06-29 23:30:00	2012-06-29 14:00:00	1656.22	1007.42	181	4.40264	15.2242						181	0.38944	10.565						180	-1.47309	5.90493						181	6.50225	12.3726
2012-06-30 23:30:00	2012-06-30 14:00:00	963.189	773.67	182	0.260019	12.1705						182	-2.40458	8.28956						181	1.01605	9.21801						182	4.42174	10.7764
2012-07-01 23:30:00	2012-07-01 14:00:00	1586	762.128	183	-1.02242	10.4021						183	-3.44322	7.14963						182	-1.4467	7.23125						183	2.87836	9.23732
2012-07-02 23:30:00	2012-07-02 14:00:00	1600	977.139	184	1.63832	12.7383	2.5		0.579443	0.172	-0.208	184	-1.62576	8.8162	3.23333		0.387927	0.118	-0.215	183	-2.53183	6.00432	2.16667		0.469452	0.13	-0.24	184	4.7637	11.1072	2.73333		0.835732	0.38	-0.201
2012-07-03 23:30:00	2012-07-03 14:00:00	1560.67	940.195	185	1.05351	12.2783						185	-1.9444	8.47536						184	-1.31849	7.10039						185	4.67547	11.1616
2012-07-04 23:30:00	2012-07-04 14:00:00	1098.77	656.693	186	-0.71603	9.58265						186	-3.62773	6.43237						185	-1.81451	6.60876						186	3.90989	9.95615
2012-07-05 23:30:00	2012-07-05 14:00:00	1184.58	640.011	187	-2.3937	8.40363						187	-4.54428	5.65217						186	-2.77755	5.10714						187	2.763	9.17509
2012-07-06 23:30:00	2012-07-06 14:00:00	1640	1030.31	188	0.482313	12.0016						188	-2.13659	8.2679						187	-3.72892	4.28244						188	4.66927	11.7006
2012-07-07 23:30:00	2012-07-07 14:00:00	1600	982.6	189	-0.290908	10.5338						189	-2.88863	7.16847						188	-2.86357	5.51644						189	3.76713	10.4051
2012-07-08 23:30:00	2012-07-08 14:00:00	1560.67	940.195	190	-0.0270786	10.5468						190	-2.74364	7.0716						189	-3.38314	4.75385						190	4.14916	10.7466
2012-07-09 23:30:00	2012-07-09 14:00:00	1266.22	857.362	191	0.691575	10.4813						191	-2.53664	6.85309						190	-3.234	4.69328						191	5.15892	11.3098
2012-07-10 23:30:00	2012-07-10 14:00:00	1250.22	786.573	192	0.178749	9.4962						192	-2.96226	6.10058						191	-2.79676	4.65295						192	4.6696	10.6419
2012-07-11 23:30:00	2012-07-11 14:00:00	1118.19	710.64	193	-0.723704	8.35225						193	-3.56866	5.24866						192	-2.94573	4.15448						193	4.0082	9.93326
2012-07-12 23:30:00	2012-07-12 14:00:00	1075.46	703.826	194	-0.296031	7.70031						194	-3.45705	4.78235						193	-3.27506	3.61594						194	4.10072	9.25916
2012-07-13 23:30:00	2012-07-13 14:00:00	967.244	651.337	195	-0.568347	7.08217						195	-3.65846	4.27575						194	-3.0136	3.24647						195	3.95918	9.03098
2012-07-14 23:30:00	2012-07-14 14:00:00	606.4	590.625	196	-1.54991	6.33315						196	-4.12025	3.76424						195	-3.00689	2.94588						196	3.05668	8.4929
2012-07-15 23:30:00	2012-07-15 14:00:00	1167.73	751.434	197	-0.164732	7.5607						197	-3.19244	4.46386						196	-3.39505	2.56371						197	4.18431	9.58418
2012-07-16 23:30:00	2012-07-16 14:00:00	983.489	688.412	198	-0.803898	6.60048						198	-3.49864	3.83967						197	-2.81433	2.94598						198	3.19433	8.4534
2012-07-17 23:30:00	2012-07-17 14:00:00	649.233	534.511	199	-1.89735	5.23001						199	-4.10792	2.93152						198	-2.94351	2.48954						199	2.41138	7.55028
2012-07-18 23:30:00	2012-07-18 14:00:00	510.5	367.135	200	-3.20398	3.921						200	-4.79785	2.07265						199	-3.20835	1.91895						200	1.4503	6.75155
2012-07-19 23:30:00	2012-07-19 14:00:00	834.1	597.711	201	-1.94442	5.3837						201	-3.93231	2.87284						200	-3.61453	1.38721						201	2.46278	8.07408
2012-07-20 23:30:00	2012-07-20 14:00:00	1032.8	685.546	202	-1.222	5.81594						202	-3.40521	3.06034						201	-3.1511	1.822						202	3.07399	8.49882
2012-07-21 23:30:00	2012-07-21 14:00:00	1255.33	791.529	203	-0.744689	6.0513	1.93333		0.172729	0.049	-0.21	203	-3.01498	3.12503	3.26667		0.190237	0.056	-0.218	202	-2.68059	1.88915	2.03333		0.196531	0.06	-0.234	203	3.44293	8.73107	2.9		0.782434	0.31	-0.233
2012-07-22 23:30:00	2012-07-22 14:00:00	1466.78	841.413	204	-0.973174	5.79078						204	-3.03891	2.89455						203	-2.30647	1.88739						204	3.21299	8.60692
2012-07-23 23:30:00	2012-07-23 14:00:00	1640.67	1015.38	205	-0.957506	5.96728						205	-2.96753	2.87143						204	-2.26102	1.72212						205	3.08179	8.78691
2012-07-24 23:30:00	2012-07-24 14:00:00	1439.56	968.164	206	-1.73221	5.35293						206	-3.40221	2.34032						205	-2.20398	1.7129						206	2.4223	8.43134
2012-07-25 23:30:00	2012-07-25 14:00:00	1495.89	853.329	207	-2.48485	4.87662						207	-4.05501	1.69181						206	-2.41885	1.40952						207	1.37205	7.73495
2012-07-26 23:30:00	2012-07-26 14:00:00	1505.11	948.809	208	-2.73562	5.01467						208	-4.18804	1.73546						207	-2.69136	1.05213						208	1.00961	7.78963
2012-07-27 23:30:00	2012-07-27 14:00:00	1524.33	887.095	209	-3.21576	4.90964						209	-4.25854	1.81366						208	-2.76031	1.13784						209	0.625717	7.76195
2012-07-28 23:30:00	2012-07-28 14:00:00	1258.89	632.319	210	-4.28251	3.71948						210	-4.53354	1.45813						209	-2.84083	1.15417						210	-0.753333	6.31737
2012-07-29 23:30:00	2012-07-29 14:00:00	674.133	455.573	211	-4.52018	2.98948						211	-4.46127	1.24892						210	-3.00338	0.876252						211	-1.16396	5.51125
2012-07-30 23:30:00	2012-07-30 14:00:00	1433.99	880.292	212	-2.55539	4.67933						212	-3.53792	2.02818						211	-2.89798	0.697173						212	1.03165	7.57102
2012-07-31 23:30:00	2012-07-31 14:00:00	1249.59	660.146	213	-2.73256	4.03973						213	-3.46675	1.84121						212	-2.2545	1.224						213	0.752275	6.9786
2012-08-01 23:30:00	2012-08-01 14:00:00	1565.78	863.733	214	-2.10869	4.73746						214	-3.16037	2.23752						213	-2.27479	1.05046						214	1.27253	7.81004
2012-08-02 23:30:00	2012-08-02 14:00:00	1570.33	981.549	215	-2.43295	4.80001	1.86667		0.159153	0.036	-0.21	215	-3.32916	2.34983	2.76667		0.129257	0.029	-0.235	214	-2.19472	1.31292	2.16667		0.169212	0.036	-0.224	215	0.594495	7.77516	2.26667		0.568895	0.15	-0.217
2012-08-03 23:30:00	2012-08-03 14:00:00	301.344	464.306	216	-3.56216	3.21472						216	-3.72504	1.67256						215	-2.43386	1.39162						216	-0.570925	6.11105
2012-08-04 23:30:00	2012-08-04 14:00:00	1414	671.714	217	-2.86933	3.78525						217	-3.33837	2.01472						216	-2.7129	0.857934						217	-0.0259792	6.69273
2012-08-05 23:30:00	2012-08-05 14:00:00	1358.89	748.857	218	-2.76515	3.98934						218	-3.26313	2.18465						217	-2.49321	1.10001						218	-0.189596	6.87462
2012-08-06 23:30:00	2012-08-06 14:00:00	891.333	620.541	219	-3.03277	3.7038						219	-3.35884	2.10872						218	-2.521	1.21561						219	-0.578933	6.60293
2012-08-07 23:30:00	2012-08-07 14:00:00	1400.44	839.725	220	-1.86669	4.42185						220	-2.62886	2.57853						219	-2.65727	1.12493						220	0.876357	7.63871
2012-08-08 23:30:00	2012-08-08 14:00:00	1212.74	761.194	221	-1.67436	4.09081						221	-2.41816	2.46695						220	-2.20549	1.42083						221	0.882276	7.18608
2012-08-09 23:30:00	2012-08-09 14:00:00	1167.51	710.311	222	-1.55	3.90594						222	-2.27267	2.43273						221	-2.11519	1.33485						222	0.879762	6.94816
2012-08-10 23:30:00	2012-08-10 14:00:00	1219.33	630.287	223	-1.66778	3.40188						223	-2.26718	2.18657						222	-2.07299	1.29618						223	0.380061	6.13415
2012-08-11 23:30:00	2012-08-11 14:00:00	849.544	484.98	224	-1.72976	3.10811						224	-2.2255	2.07931						223	-2.08633	1.14436						224	0.183221	5.79175
2012-08-12 23:30:00	2012-08-12 14:00:00	1394.78	795.127	225	-0.660927	4.07478						225	-1.48099	2.7596						224	-2.11604	1.03364						225	1.64252	7.2751
2012-08-13 23:30:00	2012-08-13 14:00:00	1066.46	701.305	226	-0.892945	3.76225	0.5		0.0991534	0.006	-0.19	226	-1.56324	2.63043	0.4		0.0692569	0.001	-0.215	225	-1.65262	1.46542	0.2		0.109212	0.006	-0.204	226	1.14878	6.80669	3.36667		0.508895	0.12	-0.197
2012-08-14 23:30:00	2012-08-14 14:00:00	1400.53	757.057	227	-0.936211	3.81827						227	-1.54183	2.74018						226	-1.71861	1.36887						227	0.98604	6.90814
2012-08-15 23:30:00	2012-08-15 14:00:00	880.267	395.431	228	-1.98063	2.48005						228	-2.21324	1.86537						227	-1.71598	1.43023						228	-0.995787	4.67118
2012-08-16 23:30:00	2012-08-16 14:00:00	844.456	610.426	229	-1.66195	3.23472						229	-1.93128	2.47294						228	-2.12821	0.880433						229	-0.373779	5.97575
2012-08-17 23:30:00	2012-08-17 14:00:00	818.878	528.74	230	-1.68747	3.08979						230	-1.95165	2.43452						229	-1.95039	1.23396						230	-0.584013	5.73341
2012-08-18 23:30:00	2012-08-18 14:00:00	1410.44	881.382	231	-0.847564	3.8848						231	-1.2514	3.10239						230	-2.02307	1.19286						231	0.740418	7.1118
2012-08-19 23:30:00	2012-08-19 14:00:00	1534.44	961.706	232	-1.41957	3.96896						232	-1.53019	3.24097						231	-1.54097	1.61938						232	-0.0646965	7.25816
2012-08-20 23:30:00	2012-08-20 14:00:00	1377.67	825.79	233	-2.2117	3.47072						233	-2.20197	2.82677						232	-1.68813	1.58214						233	-1.82619	6.12331
2012-08-21 23:30:00	2012-08-21 14:00:00	1253.06	792.748	234	-1.52755	3.58711						234	-1.84236	2.91319						233	-2.16449	1.29134						234	-1.47995	6.08266
2012-08-22 23:30:00	2012-08-22 14:00:00	1172.64	748.53	235	-1.61394	3.37692						235	-1.89569	2.72604						234	-2.18041	1.30402						235	-2.15379	5.47602
2012-08-23 23:30:00	2012-08-23 14:00:00	1282	834.768	236	-0.733841	3.73307						236	-1.23591	2.98984						235	-2.12076	1.2173						236	-1.41109	5.80274
2012-08-24 23:30:00	2012-08-24 14:00:00	325.022	269.642	237	-1.80499	2.02058						237	-2.06684	1.65547						236	-1.7588	1.35069						237	-3.60826	3.02189
2012-08-25 23:30:00	2012-08-25 14:00:00	760.544	539.729	238	-3.35792	0.9633						238	-3.39106	0.78072						237	-2.15488	0.630807						238	-3.48758	4.1655
2012-08-26 23:30:00	2012-08-26 14:00:00	974.744	565.784	239	-4.35612	0						239	-4.05089	0						238	-3.15026	0.30792						239	-3.82834	4.06108
2012-08-27 23:30:00	2012-08-27 14:00:00	1051.32	660.412	240	-4.06266	0						240	-3.54278	0						239	-3.90439	0						240	-3.1086	4.37458
2012-08-28 23:30:00	2012-08-28 14:00:00	1406.33	894.047	241	-3.98499	0						241	-3.28766	0						240	-3.69504	0						241	-2.87183	4.57245
2012-08-29 23:30:00	2012-08-29 14:00:00	1244.43	769.154	242	-4.30941	0						242	-3.46756	0						241	-3.62208	0						242	-3.84683	4.26399
2012-08-30 23:30:00	2012-08-30 14:00:00	1194.11	712.899	243	-4.44444	0						243	-3.4502	0.012492						242	-3.91997	0						243	-4.79483	3.51091
2012-08-31 23:30:00	2012-08-31 14:00:00	340.378	198.397	244	-4.05735	0						244	-3.3531	0.0931426						243	-3.99995	0						244	-6.02826	1.60037
2012-09-01 23:30:00	2012-09-01 14:00:00	885.856	536.111	245	-3.92342	0						245	-3.06239	0.314005						244	-3.71905	0						245	-4.27076	2.98435
2012-09-02 23:30:00	2012-09-02 14:00:00	1351.89	782.826	246	-3.77587	0.0766788						246	-2.84105	0.49747						245	-3.68002	0						246	-3.72113	3.22516
2012-09-03 23:30:00	2012-09-03 14:00:00	1387.33	852.523	247	-3.57956	0.39102						247	-2.74181	0.680644						246	-3.58813	0.119943						247	-3.75134	3.08607
2012-09-04 23:30:00	2012-09-04 14:00:00	967.989	673.195	248	-3.06806	0.658632						248	-2.47353	0.825274						247	-3.32856	0.611219						248	-3.66544	2.70948
2012-09-05 23:30:00	2012-09-05 14:00:00	602.622	344.877	249	-2.8266	0.675148						249	-2.35856	0.786402						248	-2.72772	1.04169						249	-4.13553	1.79596
2012-09-06 23:30:00	2012-09-06 14:00:00	1160.11	726.335	250	-2.04151	1.23426						250	-1.89946	1.13791						249	-2.46468	1.10884						250	-3.20946	2.32045
2012-09-07 23:30:00	2012-09-07 14:00:00	400.978	248.662	251	-2.17153	0.829418						251	-1.97685	0.839813						250	-1.51628	1.94372						251	-3.88967	1.12884
2012-09-08 23:30:00	2012-09-08 14:00:00	750.767	511.257	252	-1.64653	1.53214						252	-1.60698	1.31264						251	-1.8451	1.38522						252	-3.26596	1.60574
2012-09-09 23:30:00	2012-09-09 14:00:00	1234.33	723.634	253	-1.0645	2.05564						253	-1.36027	1.58987						252	-1.06958	2.46587						253	-2.9124	1.6832
2012-09-10 23:30:00	2012-09-10 14:00:00	1341.78	833.678	254	-0.782769	2.52937	0.3					254	-1.10678	1.8505	0.37		0.0221322	0.006		253	-0.404466	3.23623	0.23		0.207767	0.05		254	-2.66934	1.62451	1.12		0.108842	0.03
2012-09-11 23:30:00	2012-09-11 14:00:00	1269.22	791.789	255	-0.798463	2.55998						255	-1.14564	1.88262						254	0.0866845	3.95218						255	-2.73554	1.29776
2012-09-12 23:30:00	2012-09-12 14:00:00	300.544	222.648	256	-1.4035	1.36994						256	-1.46925	1.53571						255	-0.0257134	3.99528						256	-3.03828	0.614641
2012-09-13 23:30:00	2012-09-13 14:00:00	637.578	505.574	257	-0.379345	2.14444						257	-0.121819	2.82354						256	-1.30916	2.30072						257	-2.43614	1.03381
2012-09-14 23:30:00	2012-09-14 14:00:00	1173.11	761.815	258	0.171616	2.65492						258	1.14808	4.04089						257	0.0733879	3.44159						258	-2.08116	1.31786
2012-09-15 23:30:00	2012-09-15 14:00:00	487.6	353.336	259	-0.867794	1.71848						259	-0.463913	2.60903						258	0.885638	4.17715						259	-2.67515	0.805092
2012-09-16 23:30:00	2012-09-16 14:00:00	677.989	433.614	260	-0.854201	1.83937						260	-0.29459	3.05543						259	-0.583489	2.80967						260	-2.67056	0.878157
2012-09-17 23:30:00	2012-09-17 14:00:00	1233.33	769.004	261	-0.0819427	2.63465						261	1.58757	5.09						260	-0.517753	2.97054						261	-2.97903	0.553875
2012-09-18 23:30:00	2012-09-18 14:00:00	1218.44	760.646	262	-0.190203	2.61418						262	1.48977	5.29415						261	0.645181	4.13575						262	-3.13766	0
2012-09-19 23:30:00	2012-09-19 14:00:00	715.322	480.38	263	-0.522875	2.00187						263	0.142361	3.76783						262	0.535474	4.10526						263	-2.46853	0
2012-09-20 23:30:00	2012-09-20 14:00:00	1159.11	645.158	264	0.185148	2.38704						264	1.8695	4.98884						263	-0.124976	3.22123						264	-1.8127	0
2012-09-21 23:30:00	2012-09-21 14:00:00	926.367	592.891	265	0.205448	2.36617						265	1.95934	4.9199						264	0.757058	3.78381						265	-1.71997	0
2012-09-22 23:30:00	2012-09-22 14:00:00	872.667	468.798	266	-0.433194	1.8195						266	0.591338	3.78777						265	0.802303	3.76604						266	-1.86945	0
2012-09-23 23:30:00	2012-09-23 14:00:00	1088	658.865	267	0.313449	2.42492						267	2.56839	5.49855						266	-0.148221	2.91789						267	-1.6087	0
2012-09-24 23:30:00	2012-09-24 14:00:00	554.472	410.745	268	-0.424478	1.80982						268	0.457736	3.63299						267	0.915877	3.83207						268	-1.82614	0
2012-09-25 23:30:00	2012-09-25 14:00:00	1187.22	690.425	269	-1.73509	0.994618	0.37					269	1.47529	5.65336	3.03		0.581856	0.127		268	-0.0983258	2.93224	0.43		0.0139715	0.002		269	-2.49966	0	0		0.0333953	0
2012-09-26 23:30:00	2012-09-26 14:00:00	963.889	612.239	270	-2.91892	0						270	0.704699	5.24793						269	-2.46504	1.56864						270	-2.59818	0
2012-09-27 23:30:00	2012-09-27 14:00:00	351.537	260.859	271	-2.79809	0						271	-1.71445	2.39674						270	-4.60818	0						271	-2.23979	0
2012-09-28 23:30:00	2012-09-28 14:00:00	795.778	519.492	272	-2.75084	0						272	0.564867	4.69776						271	-4.42136	0						272	-2.18729	0
2012-09-29 23:30:00	2012-09-29 14:00:00	945.244	623.282	273	-2.63424	0						273	1.24883	5.35339						272	-4.35176	0						273	-2.07258	0
2012-09-30 23:30:00	2012-09-30 14:00:00	1023.14	628.066	274	-2.51308	0						274	1.73906	5.41454						273	-4.20245	0						274	-1.8125	0
2012-10-01 23:30:00	2012-10-01 14:00:00	526.933	328.366	275	-2.25985	0						275	-0.0336148	3.09783						274	-4.0113	0						275	-1.47784	0
2012-10-02 23:30:00	2012-10-02 14:00:00	963.922	618.35	276	-2.57804	0						276	1.12575	5.42195						275	-3.69471	0						276	-1.96473	0
2012-10-03 23:30:00	2012-10-03 14:00:00	1064.07	670.159	277	-2.55069	0						277	1.12452	5.8613						276	-4.12157	0						277	-1.99001	0
2012-10-04 23:30:00	2012-10-04 14:00:00	609.1	350.519	278	-2.76898	0						278	-1.85272	3.30147						277	-4.08212	0						278	-2.23038	0
2012-10-05 23:30:00	2012-10-05 14:00:00	705.811	403.181	279	-2.54421	0						279	-0.29168	3.78862						278	-4.35414	0						279	-1.84178	0
2012-10-06 23:30:00	2012-10-06 14:00:00	401.266	258.133	280	-2.70614	0						280	-2.75653	2.28017						279	-4.073	0						280	-2.09401	0
2012-10-07 23:30:00	2012-10-07 14:00:00	651.489	454.851	281	-2.34864	0						281	0.871585	4.24051						280	-4.2636	0						281	-1.54338	0
2012-10-08 23:30:00	2012-10-08 14:00:00	710.6	469.103	282	-2.26617	0						282	0.943346	4.19933						281	-3.82201	0						282	-1.45503	0
2012-10-09 23:30:00	2012-10-09 14:00:00	809.078	482.781	283	-2.03794	0						283	1.80541	4.53903						282	-3.71715	0						283	-1.19461	0
2012-10-10 23:30:00	2012-10-10 14:00:00	528.133	286.499	284	-1.89096	0.00883774						284	0.294082	2.66875						283	-3.4091	0						284	-1.02626	0
2012-10-11 23:30:00	2012-10-11 14:00:00	429.456	294.084	285	-1.827	0.054851						285	0.307715	2.64413						284	-3.23773	0						285	-0.996193	0
2012-10-12 23:30:00	2012-10-12 14:00:00	847.622	522.809	286	-1.63498	0.119249						286	2.34185	4.66566						285	-3.21275	0						286	-0.932234	0
2012-10-13 23:30:00	2012-10-13 14:00:00	849.622	572.752	287	-1.91901	0.182408						287	2.01209	5.108						286	-3.06235	0						287	-1.31944	0
2012-10-14 23:30:00	2012-10-14 14:00:00	484	368.757	288	-1.70125	0.204615						288	0.692914	3.26059						287	-3.51588	0						288	-1.08105	0
2012-10-15 23:30:00	2012-10-15 14:00:00	399.2	269.656	289	-1.82183	0.213832						289	-0.668005	2.33198						288	-3.26973	0						289	-1.27059	0
2012-10-16 23:30:00	2012-10-16 14:00:00	339.633	222.633	290	-1.67487	0.247176						290	-0.426728	2.04133						289	-3.39155	0						290	-1.05377	0
2012-10-17 23:30:00	2012-10-17 14:00:00	871.533	534.122	291	-1.54684	0.383325						291	1.7692	4.56339						290		0						291	-1.16364	0
2012-10-18 23:30:00	2012-10-18 14:00:00	846.078	549.659	292	-1.65614	0.441335						292	0.595417	4.69472						291		0						292	-1.50138	0
2012-10-19 23:30:00	2012-10-19 14:00:00	811.678	508.137	293	-1.61909	0.502316						293	0.595547	4.571						292		0						293	-1.49862	0
2012-10-20 23:30:00	2012-10-20 14:00:00	784.356	496.029	294	-1.5505	0.52228						294	0.498616	4.26609						293		0						294	-1.41449	0
2012-10-21 23:30:00	2012-10-21 14:00:00	356.311	220.479	295	-1.6025	0.418151						295	-0.799704	1.92682						294		0						295	-1.14994	0
2012-10-22 23:30:00	2012-10-22 14:00:00	128.329	84.1416	296	-2.10016	0.256762						296	-2.96759	0.720949						295		0						296	-1.61031	0
2012-10-23 23:30:00	2012-10-23 14:00:00	427.444	263.333	297	-1.907	0.520584						297	-2.72233	1.00478						296		0						297	-1.61711	0
2012-10-24 23:30:00	2012-10-24 14:00:00	139.789	96.175	298	-1.9318	0.328945						298	-3.04414	0						297		0						298	-1.36229	0
2012-10-25 23:30:00	2012-10-25 14:00:00	318.222	236.726	299	-1.66848	0.526318						299	-2.96882	0						298		0						299	-1.36382	0
2012-10-26 23:30:00	2012-10-26 14:00:00	770.522	483.382	300	-0.780811	0.803664						300	-1.81597	0						299		0						300	-0.731882	0
2012-10-27 23:30:00	2012-10-27 14:00:00	224.776	151.601	301	-0.789018	0.485111						301	-1.43755	0						300		0						301	-0.547102	0
2012-10-28 23:30:00	2012-10-28 14:00:00	680.478	449.118	302	-0.37259	0.837658						302	-1.44757	0						301		0						302	-0.603456	0
2012-10-29 23:30:00	2012-10-29 14:00:00	651.444	411.564	303	-0.0752614	0.895176						303	-1.14496	0						302		0						303	-0.420792	0
2012-10-30 23:30:00	2012-10-30 14:00:00	135.711	105.705	304	-0.555517	0.467398						304	-1.23412	0						303		0						304	-0.520558	0
2012-10-31 23:30:00	2012-10-31 14:00:00	560.889	354.182	305	-0.378211	0.893038						305	-1.67379	0						304		0						305	-0.831904	0
2012-11-01	2012-11-01 14:00:00	130.9	105.162	306								306								305								306
2012-11-02	2012-11-02 14:00:00	475.033	323.073	307								307								306								307
2012-11-03	2012-11-03 14:00:00	427.489	276.632	308								308								307								308
2012-11-04	2012-11-04 14:00:00	353.561	234.829	309								309								308								309
2012-11-05	2012-11-05 14:00:00	308.9	217.443	310								310								309								310
2012-11-06	2012-11-06 14:00:00	221.744	166.923	311								311								310								311
2012-11-07	2012-11-07 14:00:00	196.256	132.214	312								312								311								312
2012-11-08	2012-11-08 14:00:00	135.756	91.4612	313								313								312								313
2012-11-09	2012-11-09 14:00:00	259.222	174.155	314								314								313								314
2012-11-10	2012-11-10 14:00:00	375.667	248.489	315								315								314								315
2012-11-11	2012-11-11 14:00:00	229.511	157.567	316								316								315								316
2012-11-12	2012-11-12 14:00:00	336.033	218.41	317								317								316								317
2012-11-13	2012-11-13 14:00:00	493.422	323.357	318								318								317								318
2012-11-14	2012-11-14 14:00:00	282.833	203.457	319								319								318								319
2012-11-15	2012-11-15 14:00:00	124.7	87.6835	320								320								319								320
2012-11-16	2012-11-16 14:00:00	83.59	62.2547	321								321								320								321
2012-11-17	2012-11-17 14:00:00	119.944	86.0228	322								322								321								322
2012-11-18	2012-11-18 14:00:00	95.5344	69.6544	323								323								322								323
2012-11-19	2012-11-19 14:00:00	123	88.55	324								324								323								324
2012-11-20	2012-11-20 14:00:00	341.356	230.708	325								325								324								325
2012-11-21	2012-11-21 14:00:00	94.7067	69.9887	326								326								325								326
2012-11-22	2012-11-22 14:00:00	164.622	107.624	327								327								326								327
2012-11-23	2012-11-23 14:00:00	289.9	181.879	328								328								327								328
2012-11-24	2012-11-24 14:00:00	101.263	76.5291	329								329								328								329
2012-11-25	2012-11-25 14:00:00	106.189	91.9467	330								330								329								330
2012-11-26	2012-11-26 14:00:00	418.944	266.508	331								331								330								331
2012-11-27	2012-11-27 14:00:00	131.223	97.46	332								332								331								332
2012-11-28	2012-11-28 14:00:00	30.0256	24.7623	333								333								332								333
2012-11-29	2012-11-29 14:00:00	31.7044	27.7583	334								334								333								334
2012-11-30	2012-11-30 14:00:00	135.057	105.227	335								335								334								335
2012-12-01	2012-12-01 14:00:00	319.189	205.328	336								336								335								336
2012-12-02	2012-12-02 14:00:00	292.956	194.458	337								337								336								337
2012-12-03	2012-12-03 14:00:00	94.0133	73.68	338								338								337								338
2012-12-04	2012-12-04 14:00:00	181.064	130.122	339								339								338								339
2012-12-05	2012-12-05 14:00:00	137.76	101.971	340								340								339								340
2012-12-06	2012-12-06 14:00:00	182.711	131.482	341								341								340								341
2012-12-07	2012-12-07 14:00:00	227.367	163.515	342								342								341								342
2012-12-08	2012-12-08 14:00:00	293.233	206.67	343								343								342								343
2012-12-09	2012-12-09 14:00:00	250.156	179.958	344								344								343								344
2012-12-10	2012-12-10 14:00:00	98.4133	71.8641	345								345								344								345
2012-12-11	2012-12-11 14:00:00	263.411	186.474	346								346								345								346
2012-12-12	2012-12-12 14:00:00	315.556	210.616	347								347								346								347
2012-12-13	2012-12-13 14:00:00	281.222	197.381	348								348								347								348
2012-12-14	2012-12-14 14:00:00	160.7	127.136	349								349								348								349
2012-12-15	2012-12-15 14:00:00	121.744	90.258	350								350								349								350
2012-12-16	2012-12-16 14:00:00	196.356	138.253	351								351								350								351
2012-12-17	2012-12-17 14:00:00	146.034	100.319	352								352								351								352
2012-12-18	2012-12-18 14:00:00	112.326	80.582	353								353								352								353
2012-12-19	2012-12-19 14:00:00	126.722	93.0554	354								354								353								354
2012-12-20	2012-12-20 14:00:00	54.3567	43.1038	355								355								354								355
2012-12-21	2012-12-21 14:00:00	205.304	146.04	356								356								355								356
2012-12-22	2012-12-22 14:00:00	77.7044	64.6123	357								357								356								357
2012-12-23	2012-12-23 14:00:00	92.35	71.9154	358								358								357								358
2012-12-24	2012-12-24 14:00:00	120.47	90.7836	359								359								358								359
2012-12-25	2012-12-25 14:00:00	192.567	143.919	360								360								359								360
2012-12-26	2012-12-26 14:00:00	200.064	131.064	361								361								360								361
2012-12-27	2012-12-27 14:00:00	214.937	150.207	362								362								361								362
2012-12-28	2012-12-28 14:00:00	372.478	253.45	363								363								362								363
2012-12-29	2012-12-29 14:00:00	242.378	179.243	364								364								363								364
2012-12-30	2012-12-30 14:00:00	132.921	110.183	365								365								364								365
2012-12-31	2012-12-31 14:00:00	227.644	157.837	366								366								365								366
2013-01-01 23:30:00	2013-01-01 14:00:00	253.344	171.418	1	-0.887405	0.240196						1	-0.483694	0.411174						366								1	-2.1519	0
2013-01-02 23:30:00	2013-01-02 14:00:00	113.767	83.9052	2	-0.934014	0.165071						2	-0.664781	0.313882						1	-1.19809	0						2	-2.06837	0
2013-01-03 23:30:00	2013-01-03 14:00:00	69.6122	47.5112	3	-1.11825	0.104717						3	-0.945685	0.209903						2	-1.14843	0						3	-2.30781	0
2013-01-04 23:30:00	2013-01-04 14:00:00	153.978	102.347	4	-1.08763	0.210939						4	-0.964265	0.379476						3	-1.29851	0						4	-2.43892	0
2013-01-05 23:30:00	2013-01-05 14:00:00	292.056	196.92	5	-0.784522	0.344288						5	-0.69939	0.564721						4	-1.37847	0						5	-2.07524	0
2013-01-06 23:30:00	2013-01-06 14:00:00	49.3311	37.366	6	-0.852593	0.114303						6	-0.778716	0.232297						5	-1.15486	0						6	-1.70999	0
2013-01-07 23:30:00	2013-01-07 14:00:00	160.378	109.668	7	-0.468166	0.277219						7	-0.289935	0.491714						6	-0.948215	0						7	-1.29538	0
2013-01-08 23:30:00	2013-01-08 14:00:00	69.3044	49.6489	8	-0.600087	0.152287						8	-0.382896	0.297091						7	-0.692248	0						8	-1.2623	0
2013-01-09 23:30:00	2013-01-09 14:00:00	111.652	77.5044	9	-0.796575	0.222399						9	-0.560831	0.406736						8	-0.696471	0						9	-1.69792	0
2013-01-10 23:30:00	2013-01-10 14:00:00	102.921	75.6916	10	-0.731553	0.26471						10	-0.534048	0.488456						9	-0.983341	0						10	-1.66228	0
2013-01-11 23:30:00	2013-01-11 14:00:00	196.267	137.893	11	-0.33252	0.389422						11	-0.0466691	0.661727						10	-0.952302	0						11	-1.20515	0
2013-01-12 23:30:00	2013-01-12 14:00:00	69.3044	48.5334	12	-0.562498	0.194455						12	-0.321188	0.374612						11	-0.654203	0						12	-1.22624	0
2013-01-13 23:30:00	2013-01-13 14:00:00	111.652	77.5044	13	-0.769696	0.268452						13	-0.536665	0.484974						12	-0.687126	0						13	-1.62852	0
2013-01-14 23:30:00	2013-01-14 14:00:00	102.921	75.6916	14	-0.697215	0.316878						14	-0.486747	0.577981						13	-0.971707	0						14	-1.59798	0
2013-01-15 23:30:00	2013-01-15 14:00:00	308.936	200.252	15	0.0874455	0.606638						15	0.412265	0.969073						14	-0.940877	0						15	-0.927769	0
2013-01-16 23:30:00	2013-01-16 14:00:00	183.2	120.743	16	-0.0365214	0.472973						16	0.255077	0.803671						15	-0.449603	0						16	-0.917082	0
2013-01-17 23:30:00	2013-01-17 14:00:00	414.311	245.384	17	0.161534	0.739874						17	0.546158	1.13922						16	-0.438488	0						17	-0.991519	0
2013-01-18 23:30:00	2013-01-18 14:00:00	227.333	151.925	18	0.105259	0.585002						18	0.449898	0.962753						17	-0.502091	0						18	-0.881628	0
2013-01-19 23:30:00	2013-01-19 14:00:00	202.533	141.771	19	0.28123	0.595937						19	0.598076	0.994039						18	-0.410316	0						19	-0.710218	0
2013-01-20 23:30:00	2013-01-20 14:00:00	260.644	173.811	20	0.267974	0.682498						20	0.657493	1.10774						19	-0.262709	0						20	-0.812137	0
2013-01-21 23:30:00	2013-01-21 14:00:00	265.367	157.157	21	0.356395	0.670122						21	0.700607	1.08497						20	-0.351144	0						21	-0.722837	0
2013-01-22 23:30:00	2013-01-22 14:00:00	239.467	154.083	22	0.409344	0.712364						22	0.79803	1.16326						21	-0.262957	0						22	-0.713726	0
2013-01-23 23:30:00	2013-01-23 14:00:00	222.656	141.148	23	0.348607	0.691301						23	0.755054	1.13841						22	-0.254045	0						23	-0.755057	0
2013-01-24 23:30:00	2013-01-24 14:00:00	186.322	119.302	24	0.301871	0.642708						24	0.707516	1.08411						23	-0.288657	0						24	-0.758105	0
2013-01-25 23:30:00	2013-01-25 14:00:00	442.4	274.159	25	0.83256	1.0788						25	1.3242	1.63681						24	-0.287445	0						25	-0.679192	0
2013-01-26 23:30:00	2013-01-26 14:00:00	284.144	193.78	26	0.624842	0.92794						26	1.1471	1.47085						25	-0.207199	0						26	-0.72152	0
2013-01-27 23:30:00	2013-01-27 14:00:00	346.044	220.901	27	0.525428	0.980046						27	1.09897	1.52308						26	-0.255605	0						27	-0.832083	0
2013-01-28 23:30:00	2013-01-28 14:00:00	418.689	249.863	28	0.159402	1.12017						28	0.803183	1.71055						27	-0.382957	0						28	-1.18254	0
2013-01-29 23:30:00	2013-01-29 14:00:00	318.189	199.035	29	-0.0983532	0.987618						29	0.49289	1.55743						28	-0.801458	0						29	-1.24889	0
2013-01-30 23:30:00	2013-01-30 14:00:00	250.333	159.273	30	-0.725534	0.838878						30	-0.48752	1.35913						29	-0.89725	0						30	-1.60375	0
2013-01-31 23:30:00	2013-01-31 14:00:00	341.011	214.692	31	-0.36522	1.05807						31	0.0156348	1.6495						30	-1.26802	0						31	-1.51318	0
2013-02-01 23:30:00	2013-02-01 14:00:00	283.661	177.02	32	-0.397253	0.916388						32	-0.00587919	1.45661						31	-1.14721	0						32	-1.41525	0
2013-02-02 23:30:00	2013-02-02 14:00:00	123.511	95.3	33	-0.329006	0.680601						33	0.173395	1.17911						32	-1.05229	0						33	-1.18903	0
2013-02-03 23:30:00	2013-02-03 14:00:00	622.767	366.275	34	0.603679	1.48295						34	1.34261	2.15231						33	-0.811897	0						34	-1.06144	0
2013-02-04 23:30:00	2013-02-04 14:00:00	172.822	109.065	35	-0.211545	0.831102						35	0.379583	1.4029						34	-0.70661	0						35	-1.13482	0
2013-02-05 23:30:00	2013-02-05 14:00:00	473.733	291.469	36	0.264571	1.44973						36	0.930317	2.16269						35	-0.823646	0						36	-1.19605	0
2013-02-06 23:30:00	2013-02-06 14:00:00	366.822	253.157	37	0.625516	1.46223						37	1.52117	2.24216						36	-0.921403	0						37	-0.961562	0
2013-02-07 23:30:00	2013-02-07 14:00:00	258.111	163.856	38	0.291998	1.14866						38	1.10555	1.84124						37	-0.661522	0						38	-0.94927	0
2013-02-08 23:30:00	2013-02-08 14:00:00	291.011	178.408	39	0.396761	1.20245						39	1.27822	1.9471						38	-0.672508	0						39	-0.925411	0
2013-02-09 23:30:00	2013-02-09 14:00:00	221.811	136.856	40	0.25752	1.03013						40	1.09951	1.72619						39	-0.634899	0						40	-0.901314	0
2013-02-10 23:30:00	2013-02-10 14:00:00	250.9	166.682	41	0.431252	1.19508						41	1.38394	2.00009						40	-0.610783	0						41	-0.895489	0
2013-02-11 23:30:00	2013-02-11 14:00:00	147.511	97.528	42	0.154925	0.883521						42	0.97085	1.54328						41	-0.604314	0						42	-0.879044	0
2013-02-12 23:30:00	2013-02-12 14:00:00	324.811	201.047	43	0.692485	1.41702						43	1.78123	2.35256						42	-0.578502	0						43	-0.876154	0
2013-02-13 23:30:00	2013-02-13 14:00:00	429.933	248.943	44	0.818662	1.55695						44	1.97347	2.55808						43	-0.575129	0						44	-0.882847	0
2013-02-14 23:30:00	2013-02-14 14:00:00	292.456	183.045	45	0.538891	1.36382						45	1.60456	2.29699						44	-0.585589	0						45	-0.923252	0
2013-02-15 23:30:00	2013-02-15 14:00:00	115.111	75.0843	46	-0.202553	0.700554						46	0.432127	1.22686						45	-0.649019	0						46	-0.966799	0
2013-02-16 23:30:00	2013-02-16 14:00:00	95.2556	70.5595	47	-0.240451	0.67389						47	0.364459	1.17419						46	-0.705772	0						47	-0.989324	0
2013-02-17 23:30:00	2013-02-17 14:00:00	112.7	77.3942	48	-0.101025	0.719536						48	0.552324	1.23849						47	-0.713898	0						48	-0.940333	0
2013-02-18 23:30:00	2013-02-18 14:00:00	148.191	99.9797	49	0.132857	0.905966						49	0.910067	1.53629						48	-0.645902	0						49	-0.903714	0
2013-02-19 23:30:00	2013-02-19 14:00:00	447.489	288.023	50	1.03607	1.89023						50	2.40923	3.13941						49	-0.611251	0						50	-0.940185	0
2013-02-20 23:30:00	2013-02-20 14:00:00	538.733	340.595	51	1.40984	2.09675						51	2.94743	3.47104						50	-0.670292	0						51	-0.876271	0
2013-02-21 23:30:00	2013-02-21 14:00:00	497.022	301.929	52	1.48796	2.02607						52	2.98743	3.34648						51	-0.547666	0						52	-0.810903	0
2013-02-22 23:30:00	2013-02-22 14:00:00	570.333	336.59	53	1.47873	2.03164						53	2.96579	3.34214						52	-0.436598	0						53	-0.815918	0
2013-02-23 23:30:00	2013-02-23 14:00:00	336.589	204.624	54	0.84513	1.55219						54	1.96043	2.51569						53	-0.447536	0						54	-0.882469	0
2013-02-24 23:30:00	2013-02-24 14:00:00	319.222	207.852	55	0.615042	1.58296						55	1.65178	2.5356						54	-0.561746	0						55	-0.997856	0
2013-02-25 23:30:00	2013-02-25 14:00:00	370.378	218.392	56	0.677917	1.65593						56	1.73545	2.63352						55	-0.752424	0						56	-1.00212	0
2013-02-26 23:30:00	2013-02-26 14:00:00	239.922	137.802	57	0.180983	1.14198						57	0.882766	1.75713						56	-0.759655	0						57	-0.995292	0
2013-02-27 23:30:00	2013-02-27 14:00:00	342.889	211.448	58	0.519366	1.55126						58	1.41717	2.39474						57	-0.747434	0						58	-1.02995	0
2013-02-28 23:30:00	2013-02-28 14:00:00	567.378	309.51	59	0.80613	1.96346						59	1.88797	3.05856						58	-0.797956	0						59	-1.10992	0
2013-03-01 23:30:00	2013-03-01 14:00:00	651.589	391.338	60	1.01965	2.1686						60	2.23145	3.39081						59	-0.886498	0						60	-1.12578	0
2013-03-02 23:30:00	2013-03-02 14:00:00	1032	621.694	61	1.98733	3.09213						61	3.79324	4.91194						60	-0.880439	0						61	-1.0845	0
2013-03-03 23:30:00	2013-03-03 14:00:00	889.511	475.999	62	1.34716	2.48873						62	2.70011	3.854						61	-0.847004	0						62	-1.12016	0
2013-03-04 23:30:00	2013-03-04 14:00:00	1047.89	635.633	63	2.0848	3.13051						63	3.81525	4.85802						62	-0.874748	0						63	-1.06271	0
2013-03-05 23:30:00	2013-03-05 14:00:00	1024.89	622.509	64	1.94809	3.10763						64	3.49925	4.73539						63	-0.803986	0						64	-1.11369	0
2013-03-06 23:30:00	2013-03-06 14:00:00	950.311	559.419	65	1.73792	3.03013						65	3.03818	4.50425						64	-0.883025	0						65	-1.18561	0
2013-03-07 23:30:00	2013-03-07 14:00:00	597.567	325.743	66	0.866008	2.11116						66	1.67857	2.97653						65	-0.972432	0						66	-1.15998	0
2013-03-08 23:30:00	2013-03-08 14:00:00	327.589	205.521	67	0.756175	1.63111						67	1.43709	2.17583						66	-0.932075	0						67	-0.960004	0
2013-03-09 23:30:00	2013-03-09 14:00:00	407.156	243.144	68	1.09057	1.95947						68	1.94937	2.67047						67	-0.672348	0						68	-0.93626	0
2013-03-10 23:30:00	2013-03-10 14:00:00	279.389	175.19	69	0.822451	1.55516						69	1.50994	2.06694						68	-0.661294	0						69	-0.860551	0
2013-03-11 23:30:00	2013-03-11 14:00:00	729.289	399.752	70	2.28328	2.85271						70	3.70217	4.09122						69	-0.568142	0						70	-0.783991	0
2013-03-12 23:30:00	2013-03-12 14:00:00	879.333	497.213	71	2.70868	3.32231						71	4.39379	4.83307						70	-0.463288	0						71	-0.797448	0
2013-03-13 23:30:00	2013-03-13 14:00:00	886.544	494.758	72	2.80866	3.37332						72	4.49137	4.89863						71	-0.494589	0						72	-0.769191	0
2013-03-14 23:30:00	2013-03-14 14:00:00	1219.11	726.276	73	3.78301	4.30784						73	5.93863	6.35769						72	-0.46835	0						73	-0.736145	0
2013-03-15 23:30:00	2013-03-15 14:00:00	1042.67	625.56	74	3.31483	4.11027						74	5.35986	6.01368						73	-0.440465	0						74	-0.834677	0
2013-03-16 23:30:00	2013-03-16 14:00:00	1290.11	785.075	75	4.02805	4.72813						75	6.37391	6.95055						74	-0.600604	0						75	-0.788473	0
2013-03-17 23:30:00	2013-03-17 14:00:00	1237.78	715.171	76	-0.475325	0.347909						76	6.15371	6.8658						75	-0.551646	0						76	-0.825514	0
2013-03-18 23:30:00	2013-03-18 14:00:00	810.889	496.265	77	-1.01399	0						77	4.74787	5.64415						76	-0.616712	0						77	-0.892367	0
2013-03-19 23:30:00	2013-03-19 14:00:00	541.1	356.28	78	-1.07634	0						78	3.66665	4.64022						77	-0.716836	0						78	-0.909128	0
2013-03-20 23:30:00	2013-03-20 14:00:00	627.011	369.123	79	-1.13749	0						79	4.00868	5.07387						78	-0.748976	0						79	-0.924292	0
2013-03-21 23:30:00	2013-03-21 14:00:00	487.478	294.904	80	-1.16854	0						80	3.30482	4.40698						79	-0.778356	0						80	-0.928486	0
2013-03-22 23:30:00	2013-03-22 14:00:00	1199.56	614.87	81	-0.941564	0						81	6.06068	6.94157						80	-0.795571	0						81	-0.835617	0
2013-03-23 23:30:00	2013-03-23 14:00:00	1398.33	816.987	82	-0.573785	0						82	7.88349	8.49126						81	-0.706123	0						82	-0.687492	0
2013-03-24 23:30:00	2013-03-24 14:00:00	1362.44	792.129	83	-0.801448	0						83	7.65495	8.48835						82	-0.557844	0						83	-0.762928	0
2013-03-25 23:30:00	2013-03-25 14:00:00	1373.11	800.022	84	5.02524	6.03639						84	7.64205	8.66764						83	-0.659156	0						84	-0.833026	0
2013-03-26 23:30:00	2013-03-26 14:00:00	1375.33	803.648	85	5.13665	6.1625						85	7.75045	8.82858						84	-0.753243	0						85	-0.829048	0
2013-03-27 23:30:00	2013-03-27 14:00:00	1157.04	685.498	86	4.54589	5.79569						86	6.98263	8.31858						85	-0.766857	0						86	-0.901657	0
2013-03-28 23:30:00	2013-03-28 14:00:00	969.889	584.775	87	4.02231	5.49026						87	6.32032	7.90848						86	-0.851769	0						87	-0.972293	0
2013-03-29 23:30:00	2013-03-29 14:00:00	368.578	241.818	88	1.51091	3.19574						88	2.86288	4.74226						87	-0.932021	0						88	-1.04098	0
2013-03-30 23:30:00	2013-03-30 14:00:00	755.5	470.442	89	3.30297	5.01179						89	5.3293	7.27546						88	-1.00497	0						89	-1.03961	0
2013-03-31 23:30:00	2013-03-31 14:00:00	761.478	417.086	90	2.99885	4.60244						90	4.85166	6.70964						89	-1.01845	0						90	-0.991529	0
2013-04-01 23:30:00	2013-04-01 14:00:00	1098.21	607.822	91	3.99301	5.77707						91	6.1963	8.29387						90	-0.996153	0						91	-1.04532	0
2013-04-02 23:30:00	2013-04-02 14:00:00	1071.57	618.216	92	4.47559	6.23647						92	6.82003	8.93347						91	-1.05118	0						92	-1.02596	0
2013-04-03 23:30:00	2013-04-03 14:00:00	579.267	407.796	93	2.86394	4.76815						93	4.66072	6.98186						92	-1.05265	0						93	-1.06546	0
2013-04-04 23:30:00	2013-04-04 14:00:00	421.767	280.539	94	1.91722	3.90334						94	3.39907	5.86689						93	-1.0935	0						94	-1.08271	0
2013-04-05 23:30:00	2013-04-05 14:00:00	501.878	293.879	95	1.85489	3.95422						95	3.2558	5.91644						94	-1.11842	0						95	-1.11048	0
2013-04-06 23:30:00	2013-04-06 14:00:00	955.633	520.558	96	3.7971	6.02523						96	5.80748	8.69328						95	-1.14842	0						96	-1.14309	0
2013-04-07 23:30:00	2013-04-07 14:00:00	1448.89	854.905	97	5.67347	8.08386						97	8.08536	11.2982						96	-1.17894	0						97	-1.19391	0
2013-04-08 23:30:00	2013-04-08 14:00:00	1050.4	622.807	98	4.50073	7.08389						98	6.6063	10.1204						97	-1.2229	0						98	-1.24265	0
2013-04-09 23:30:00	2013-04-09 14:00:00	500.6	321.18	99	1.87869	4.52715						99	3.13665	6.77837						98	-1.33638	0						99	-1.25442	0
2013-04-10 23:30:00	2013-04-10 14:00:00	227.533	150.43	100	-0.0930307	2.68915						100	0.399669	4.28481						99	-1.3899	0						100	-1.28751	0
2013-04-11 23:30:00	2013-04-11 14:00:00	715.589	334.127	101	1.22528	4.63881						101	1.99502	6.88993						100	-1.45343	0						101	-1.4827	0
2013-04-12 23:30:00	2013-04-12 14:00:00	267.489	219.666	102	-0.017784	3.73319						102	0.349529	5.80092						101	-1.66984	0						102	-1.57944	0
2013-04-13 23:30:00	2013-04-13 14:00:00	1050.32	618.114	103	3.24891	7.25937						103	4.4762	10.3667						102	-1.79963	0						103	-1.64585	0
2013-04-14 23:30:00	2013-04-14 14:00:00	1495.78	919.452	104	5.00131	9.29809						104	6.49093	12.8263						103	-1.90142	0						104	-1.71429	0
2013-04-15 23:30:00	2013-04-15 14:00:00	1452.56	876.018	105	4.88763	9.35325						105	6.20618	12.8926						104	-2.06187	0						105	-1.7573	0
2013-04-16 23:30:00	2013-04-16 14:00:00	603.256	325.841	106	0.532775	5.02843						106	0.758963	7.54103						105	-2.09801	0						106	-1.75694	0
2013-04-17 23:30:00	2013-04-17 14:00:00	920.422	564.951	107	2.39016	7.43674						107	3.03897	10.7385						106	-2.08114	0						107	-1.91509	0
2013-04-18 23:30:00	2013-04-18 14:00:00	1307.67	773.266	108	3.57997	9.10793	3.1		0.818		-0.17	108	4.08694	12.6766	0.57		0.61643	0.028	-0.189	107	-2.23916	0	0		0.073	0.002	-0.179	108	-2.05248	0	0		0.0455659	0	-0.2
2013-04-19 23:30:00	2013-04-19 14:00:00	974.8	529.149	109	2.09944	7.34313						109	2.66859	10.4476						108	-2.33773	0						109	-1.92075	0
2013-04-20 23:30:00	2013-04-20 14:00:00	981.556	680.536	110	4.23408	8.91493						110	5.5705	12.3286						109	-2.38032	0						110	-1.70249	0
2013-04-21 23:30:00	2013-04-21 14:00:00	1484	892.596	111	5.82567	10.468						111	7.48748	14.0623						110	-2.26938	0						111	-1.65147	0
2013-04-22 23:30:00	2013-04-22 14:00:00	1418.89	810.688	112	4.98361	10.2216						112	6.39293	13.6387						111	-2.21336	0						112	-1.79112	0
2013-04-23 23:30:00	2013-04-23 14:00:00	1419.67	803.136	113	4.97903	10.2569						113	6.57558	13.5717						112	-2.36571	0						113	-1.73593	0
2013-04-24 23:30:00	2013-04-24 14:00:00	1140.9	663.416	114	3.23237	9.33877						114	4.28123	12.3526						113	-2.44384	0						114	-1.96273	0
2013-04-25 23:30:00	2013-04-25 14:00:00	672.225	458.79	115	2.29217	8.08139						115	3.28118	10.7156						114	-2.70495	0						115	-1.82968	0
2013-04-26 23:30:00	2013-04-26 14:00:00	1140.9	663.416	116	3.28084	9.66591						116	4.55371	12.5159						115	-2.70911	0						116	-1.94652	0
2013-04-27 23:30:00	2013-04-27 14:00:00	309.578	209.337	117	-0.525384	4.8306						117	-0.235414	6.36391						116	-2.8492	0						117	-1.63151	0
2013-04-28 23:30:00	2013-04-28 14:00:00	715.689	564.069	118	4.41329	9.51611						118	5.92782	12.0653						117	-2.64054	0						118	-1.52148	0
2013-04-29 23:30:00	2013-04-29 14:00:00	553.689	358.238	119	2.23993	7.38618						119	3.31698	9.28916						118	-2.54493	0						119	-1.48646	0
2013-04-30 23:30:00	2013-04-30 14:00:00	719.711	422.144	120	2.86571	8.26666						120	4.153	10.2298						119	-2.5319	0						120	-1.50841	0
2013-05-01 23:30:00	2013-05-01 14:00:00	974.6	562.694	121	4.2597	9.97812						121	5.88563	12.2093						120	-2.5305	0.10271						121	-1.55507	0
2013-05-02 23:30:00	2013-05-02 14:00:00	414.9	311.308	122	0.94597	6.73487						122	1.89638	8.08466						121	-2.22072	0.590983						122	-1.52457	0
2013-05-03 23:30:00	2013-05-03 14:00:00	494.756	390.123	123	1.96764	7.95876						123	3.25095	9.45116						122	-2.15342	0.690861						123	-1.52575	0
2013-05-04 23:30:00	2013-05-04 14:00:00	1142.11	701.301	124	5.11839	11.957						124	7.3174	14.2374						123	-1.78399	1.15738						124	-1.68705	0
2013-05-05 23:30:00	2013-05-05 14:00:00	1574	949.593	125	7.0166	14.2333						125	9.76163	16.9938						124	-1.15611	2.21494						125	-1.74617	0
2013-05-06 23:30:00	2013-05-06 14:00:00	1368.45	655.724	126	3.90654	11.1286						126	5.55891	13.0159						125	-0.434116	3.19612						126	-1.76787	0
2013-05-07 23:30:00	2013-05-07 14:00:00	1188.31	654.194	127	3.89633	11.8643						127	5.60425	13.6602						126	-0.927433	2.89896						127	-1.89794	0
2013-05-08 23:30:00	2013-05-08 14:00:00	1604.07	874.942	128	5.22585	13.99						128	7.38283	16.2438						127	-0.712017	3.55219						128	-2.06633	0
2013-05-09 23:30:00	2013-05-09 14:00:00	1384.48	723.825	129	4.595	12.9465						129	6.54476	14.6851						128	-0.10151	4.70995						129	-1.90528	0
2013-05-10 23:30:00	2013-05-10 14:00:00	339.347	201.356	130	-1.41418	6.22527						130	-0.624895	6.43631						129	0.216458	4.80046						130	-1.66346	0
2013-05-11 23:30:00	2013-05-11 14:00:00	1100.22	557.86	131	3.99108	11.3234						131	5.87396	12.4035						130	-1.64631	2.48705						131	-1.53779	0
2013-05-12 23:30:00	2013-05-12 14:00:00	698.549	390.134	132	2.76953	9.79236						132	4.21265	10.2219						131	0.996652	4.95888						132	-1.40268	0.0102664
2013-05-13 23:30:00	2013-05-13 14:00:00	1259.94	751.263	133	6.18092	13.1464						133	8.59952	14.4903						132	0.805021	4.58275						133	-1.30651	0.0698536
2013-05-14 23:30:00	2013-05-14 14:00:00	1054.46	652.88	134	6.71152	14.1113						134	8.97977	15.1282						133	2.86949	6.6366						134	-1.33056	0.119188
2013-05-15 23:30:00	2013-05-15 14:00:00	1686.67	952.589	135	8.80197	17.1491						135	12.4122	18.9396						134	3.43506	7.51504						135	-1.32914	0.235581
2013-05-16 23:30:00	2013-05-16 14:00:00	1721.78	933.912	136	7.41609	16.8763	3.73		0.883706	0.323	-0.169	136	11.2193	18.594	4.33		0.852746	0.307	-0.156	135	4.93568	9.72492	0.83		0.558502	0.188	-0.188	136	-1.45099	0.33052	0		0.0403988	0.01	-0.193
2013-05-17 23:30:00	2013-05-17 14:00:00	1617.67	900.761	137	6.95239	17.0065						137	11.5438	20.0477						136	4.37446	10.0393						137	-1.2701	0.775763
2013-05-18 23:30:00	2013-05-18 14:00:00	1072.2	538.423	138	4.42307	13.7329						138	7.22953	15.6784						137	4.01234	10.1304						138	-1.17441	0.873197
2013-05-19 23:30:00	2013-05-19 14:00:00	1768.22	1005.72	139	9.19024	19.0606						139	15.396	24.9058						138	2.64767	8.02472						139	-0.616602	1.65981
2013-05-20 23:30:00	2013-05-20 14:00:00	707.7	476.531	140	4.29682	13.3805						140	6.79757	15.8603						139	5.59179	11.3326						140	-0.84111	1.37008
2013-05-21 23:30:00	2013-05-21 14:00:00	1527.11	770.041	141	8.34137	17.1504						141	13.4961	22.5865						140	2.57814	7.69629						141	-0.157478	2.08646
2013-05-22 23:30:00	2013-05-22 14:00:00	1083.94	654.986	142	7.08153	15.6563						142	11.4443	20.4843						141	5.17661	10.0042						142	-0.117741	2.15949
2013-05-23 23:30:00	2013-05-23 14:00:00	1313.8	769.463	143	10.0244	18.3484						143	16.5166	24.8808						142	4.44168	9.02602						143	0.577875	2.82793
2013-05-24 23:30:00	2013-05-24 14:00:00	928.344	505.748	144	5.47226	13.7855						144	8.57953	17.8126						143	6.55226	10.569						144	-0.0273679	2.3564
2013-05-25 23:30:00	2013-05-25 14:00:00	312.511	195.979	145	-0.0595501	7.67645						145	-0.187323	8.5373						144	3.373	7.7324						145	-0.84022	1.47691
2013-05-26 23:30:00	2013-05-26 14:00:00	547.911	361.708	146	3.61172	10.9276						146	4.60704	13.3957						145	0.0101373	4.04751						146	-0.110925	2.26162
2013-05-27 23:30:00	2013-05-27 14:00:00	1584.22	871.936	147	11.7797	19.8795						147	17.1601	27.2852						146	1.88081	6.02425						147	1.52661	4.25886
2013-05-28 23:30:00	2013-05-28 14:00:00	496.767	300.13	148	1.49323	9.61418						148	0.975214	10.993						147	6.63442	11.5159						148	-0.485622	2.37939
2013-05-29 23:30:00	2013-05-29 14:00:00	1467.56	811.198	149	10.1759	18.9127	4.43333		0.872022	0.439	-0.176	149	12.8769	24.2432	4.33		0.800323	0.375	-0.184	148	0.379494	5.30395	2.76667		0.831516	0.446	-0.193	149	1.50616	4.69258	0.366667		0.311541	0.13
2013-05-30 23:30:00	2013-05-30 14:00:00	1337.22	605.787	150	5.30847	14.4264						150	5.95507	17.6441						149	5.21922	10.978						150	0.478511	3.87097
2013-05-31 23:30:00	2013-05-31 14:00:00	1183.81	702.739	151	9.16964	18.3989						151	10.1126	21.9909						150	2.32184	8.33877						151	1.69713	5.23747
2013-06-01 23:30:00	2013-06-01 14:00:00	416.111	302.503	152	0.791677	9.98847						152	-1.48025	10.2773						151	4.42462	10.7082						152	-0.279453	3.36192
2013-06-02 23:30:00	2013-06-02 14:00:00	713.611	454.517	153	3.99872	13.2736						153	2.44167	14.1061						152	-0.794832	5.60807						153	0.739168	4.50304
2013-06-03 23:30:00	2013-06-03 14:00:00	437.322	267.886	154	0.534046	8.95108						154	-1.68486	8.72916						153	1.2252	7.64276						154	-0.216461	3.46724
2013-06-04 23:30:00	2013-06-04 14:00:00	423.078	322.623	155	2.74307	10.9573						155	0.447526	10.6347						154	-0.722486	5.08364						155	0.674258	4.41787
2013-06-05 23:30:00	2013-06-05 14:00:00	608.633	495.695	156	6.54393	14.2883						156	4.73985	14.2825						155	0.339678	6.30258						156	1.96538	5.72283
2013-06-06 23:30:00	2013-06-06 14:00:00	1400	864.227	157	12.2794	21.2084						157	11.4435	22.2762						156	2.75411	8.41609						157	4.03907	8.12991
2013-06-07 23:30:00	2013-06-07 14:00:00	1472.22	771.594	158	8.78494	18.8608						158	7.34929	19.2424						157	6.32007	12.8611						158	3.30048	7.6722
2013-06-08 23:30:00	2013-06-08 14:00:00	1472.89	863.841	159	9.84926	20.4864						159	8.21261	20.5432						158	4.15123	11.4995						159	4.03666	8.58305
2013-06-09 23:30:00	2013-06-09 14:00:00	1335.29	639.838	160	5.50977	15.8871						160	2.89674	14.9427						159	4.93843	12.618						160	2.78367	7.39963
2013-06-10 23:30:00	2013-06-10 14:00:00	785.311	598.468	161	6.07096	15.4099						161	2.73519	13.8677						160	2.21545	9.77744						161	3.00613	7.59814
2013-06-11 23:30:00	2013-06-11 14:00:00	1542.78	973.581	162	13.1594	22.2437						162	9.97999	20.5682						161	2.4948	9.5464						162	5.85976	10.4655
2013-06-12 23:30:00	2013-06-12 14:00:00	1757.67	998.494	163	12.1189	21.9924	3.8		0.827755	0.355	-0.173	163	9.05431	19.8954	4.3		0.799927	0.329		162	7.07457	14.0597	4.03333		0.885388	0.407	-0.169	163	5.93602	10.6759	3.23333		0.73084	0.34	-0.19
2013-06-13 23:30:00	2013-06-13 14:00:00	1175.78	725.397	164	7.15725	17.9541						164	4.13478	14.9332						163	6.54387	14.0453						164	5.05881	9.89223
2013-06-14 23:30:00	2013-06-14 14:00:00	1105.72	572.809	165	5.14893	14.2252						165	1.15352	11.2951						164	3.40928	11.4829						165	3.60912	8.46279
2013-06-15 23:30:00	2013-06-15 14:00:00	1696	907.922	166	9.98018	19.8936						166	6.07847	15.999						165	1.78369	9.18759						166	6.24543	11.1586
2013-06-16 23:30:00	2013-06-16 14:00:00	1307.78	762.354	167	7.48755	17.8235						167	3.21483	13.3012						166	5.30736	13.0638						167	6.08522	11.12
2013-06-17 23:30:00	2013-06-17 14:00:00	1739.56	960.967	168	9.07937	20.0465						168	4.71241	14.9327						167	3.69452	11.8022						168	6.88678	12.0202
2013-06-18 23:30:00	2013-06-18 14:00:00	1202.86	751.609	169	4.0007	16.4125						169	0.885454	11.2962						168	5.17714	13.4815						169	5.85005	11.0901
2013-06-19 23:30:00	2013-06-19 14:00:00	1694.11	992.59	170	5.09198	20.3463						170	2.63778	13.7045						169	2.24301	11.1621						170	7.91963	13.3331
2013-06-20 23:30:00	2013-06-20 14:00:00	1436.89	744.066	171	0.346997	15.2898						171	-1.68275	10.1835						170	4.29793	14.0425						171	5.41599	10.9
2013-06-21 23:30:00	2013-06-21 14:00:00	1401.22	850.517	172	3.86845	16.5987						172	-0.724821	11.23						171	0.829634	10.8376						172	6.8744	12.3048
2013-06-22 23:30:00	2013-06-22 14:00:00	1495.33	954.649	173	6.66367	17.4536						173	0.750017	12.0923						172	2.53384	12.1225						173	7.70791	13.0074
2013-06-23 23:30:00	2013-06-23 14:00:00	1094.07	564.375	174	0.835274	10.7277						174	-3.75292	7.22901						173	4.13989	13.1528						174	4.41854	9.65977
2013-06-24 23:30:00	2013-06-24 14:00:00	936.756	447.413	175	0.371827	8.17779						175	-4.14602	5.5024						174	-0.684304	8.26908						175	3.07603	8.10587
2013-06-25 23:30:00	2013-06-25 14:00:00	182.7	119.08	176	-3.38589	2.39227						176	-6.07961	1.50498						175	-1.68972	6.46187						176	-1.12413	3.57518
2013-06-26 23:30:00	2013-06-26 14:00:00	260.567	255.796	177	-0.766232	4.43937						177	-3.41637	3.02189						176	-5.18935	1.90392						177	1.13001	5.63357
2013-06-27 23:30:00	2013-06-27 14:00:00	1159.88	741.602	178	5.32157	10.9147						178	1.25234	8.08814						177	-3.08104	3.72555						178	6.49547	11.0331
2013-06-28 23:30:00	2013-06-28 14:00:00	1482.46	664.655	179	3.03415	8.88663						179	-0.231538	6.81449						178	2.54425	9.73636						179	5.02879	9.58652
2013-06-29 23:30:00	2013-06-29 14:00:00	1313.11	541.977	180	1.19902	6.93794						180	-1.49472	5.40949						179	0.760312	8.30012						180	3.73575	8.2522
2013-06-30 23:30:00	2013-06-30 14:00:00	1191.22	662.795	181	2.7357	7.87871						181	-0.183073	6.34381						180	-0.901643	6.74581						181	5.32392	9.69066
2013-07-01 23:30:00	2013-07-01 14:00:00	1067.64	745.606	182	2.00137	7.91427						182	-0.101534	6.66449						181	0.80287	8.07622						182	5.47648	10.013
2013-07-02 23:30:00	2013-07-02 14:00:00	1550.67	723.242	183	0.759513	6.81714						183	-1.07904	6.01086						182	0.380129	8.64557						183	4.71938	9.34433
2013-07-03 23:30:00	2013-07-03 14:00:00	1381.44	668.005	184	-0.172356	5.80217						184	-1.90746	5.30948						183	-0.723277	7.9855						184	4.24923	8.89676
2013-07-04 23:30:00	2013-07-04 14:00:00	1507.64	830.886	185	0.0545755	6.15147						185	-1.36212	6.0075						184	-1.70489	7.24978						185	4.67587	9.45311
2013-07-05 23:30:00	2013-07-05 14:00:00	1373	654.85	186	-1.36172	4.4354						186	-2.36866	4.53659						185	-1.03684	8.50431						186	3.66031	8.38409
2013-07-06 23:30:00	2013-07-06 14:00:00	1390.81	877.124	187	-0.45802	4.80826						187	-0.787082	5.34685						186	-2.88824	6.64182						187	4.86007	9.36182
2013-07-07 23:30:00	2013-07-07 14:00:00	1544.33	937.123	188	-0.779265	4.13536						188	-0.569779	5.01118						187	-0.767532	8.32275						188	4.81227	9.15176
2013-07-08 23:30:00	2013-07-08 14:00:00	1732.11	1008.27	189	-1.54039	3.40967						189	-0.91751	4.56779						188	-0.452904	8.42267						189	4.52721	9.02944
2013-07-09 23:30:00	2013-07-09 14:00:00	1619	949.421	190	-2.36033	2.40141	0.73		0.35889	-0.0045294	-0.25	190	-1.61864	3.61101	3.1		0.375568		-0.227	189	-0.932263	8.59111	2.63		0.749491	0.261	-0.238	190	4.12376	8.59631	1.8		0.712314	0.33	-0.187
2013-07-10 23:30:00	2013-07-10 14:00:00	1498	767.171	191	-2.57308	1.95666						191	-1.93135	3.05198						190	-1.74746	7.83644						191	4.12848	8.34377
2013-07-11 23:30:00	2013-07-11 14:00:00	655.411	385.583	192	-3.10629	1.12356						192	-2.84644	1.81944						191	-2.58159	6.3207						192	2.53253	6.35039
2013-07-12 23:30:00	2013-07-12 14:00:00	489.856	463.427	193	-3.14372	1.26753						193	-2.73697	2.13484						192	-4.62998	3.33918						193	3.59856	7.6694
2013-07-13 23:30:00	2013-07-13 14:00:00	1271.67	675.857	194	-3.08858	1.42502						194	-2.49665	2.49871						193	-4.58978	3.87408						194	4.08804	8.3346
2013-07-14 23:30:00	2013-07-14 14:00:00	1025.6	507.902	195	-3.38075	1.02905						195	-2.99191	1.89389						194	-3.83485	4.91511						195	2.97874	7.06453
2013-07-15 23:30:00	2013-07-15 14:00:00	595.578	609.047	196	-3.28779	1.08638						196	-2.73511	2.1167						195	-4.82543	3.59985						196	4.03018	8.07062
2013-07-16 23:30:00	2013-07-16 14:00:00	1621.11	955.553	197	-3.18447	1.34965						197	-2.2677	2.78373						196	-4.24231	4.05665						197	5.40535	9.75855
2013-07-17 23:30:00	2013-07-17 14:00:00	1451.56	834.496	198	-3.51298	1.12543						198	-2.68875	2.4989						197	-2.95072	5.82768						198	5.03451	9.59786
2013-07-18 23:30:00	2013-07-18 14:00:00	1520.89	885.227	199	-3.71051	1.01955						199	-2.84755	2.46561						198	-4.06479	4.99526						199	5.07551	9.84322
2013-07-19 23:30:00	2013-07-19 14:00:00	1543.44	907.427	200	-3.87176	0.865818						200	-3.01661	2.31965						199	-4.34504	4.95477						200	4.97586	9.77546
2013-07-20 23:30:00	2013-07-20 14:00:00	1317.78	834.842	201	-4.01801	0.679605						201	-3.21858	2.07888						200	-4.67128	4.6322						201	4.63926	9.37068
2013-07-21 23:30:00	2013-07-21 14:00:00	1693	973.22	202	-4.05972	0.625152						202	-3.06893	2.23569						201	-5.14909	4.04855						202	5.53408	10.3534
2013-07-22 23:30:00	2013-07-22 14:00:00	1676.89	973.289	203	-4.34971	0.460542						203	-3.4388	2.04305						202	-4.72923	4.438						203	4.88515	10.0082
2013-07-23 23:30:00	2013-07-23 14:00:00	1673.11	992.509	204	-4.32318	0.323746						204	-3.29238	1.98351						203	-5.48536	4.00937						204	5.62232	10.3511
2013-07-24 23:30:00	2013-07-24 14:00:00	1665	1011.44	205	-4.44805	0.172582						205	-3.41535	1.84682						204	-5.29408	3.80765						205	5.52067	10.2615
2013-07-25 23:30:00	2013-07-25 14:00:00	932.5	660.358	206	-4.80361	0.0130168						206	-4.1771	1.35727						205	-5.5051	3.47276						206	3.42536	8.60704
2013-07-26 23:30:00	2013-07-26 14:00:00	1062.06	636.048	207	-4.61429	0.00792386						207	-4.15804	1.10048						206	-7.07523	2.256						207	2.75585	7.33434
2013-07-27 23:30:00	2013-07-27 14:00:00	811.867	659.672	208	-4.68715	0.00860598						208	-4.18471	1.18759						207	-7.15256	1.84245						208	3.78135	8.54626
2013-07-28 23:30:00	2013-07-28 14:00:00	1124.78	663.178	209	-4.71507	0.00856912						209	-4.38033	1.04215						208	-7.12252	1.85136						209	3.05468	7.92639
2013-07-29 23:30:00	2013-07-29 14:00:00	1629.22	987.266	210	-4.99422	0.0179039						210	-4.55443	1.25051						209	-7.39408	1.60833						210	4.13248	9.86871
2013-07-30 23:30:00	2013-07-30 14:00:00	1062.06	636.048	211	-4.70799	0.0521427						211	-4.52963	0.790869						210	-7.66025	1.976						211	2.14796	6.99213
2013-07-31 23:30:00	2013-07-31 14:00:00	811.867	659.672	212	-4.59039	0.101169						212	-4.29649	0.829178						211	-7.91205	1.10146						212	3.2642	8.02773
2013-08-01 23:30:00	2013-08-01 14:00:00	1124.78	663.178	213	-4.56491	0.143946						213	-4.31251	0.701413						212	-7.50503	1.02672						213	2.53753	7.40824
2013-08-02 23:30:00	2013-08-02 14:00:00	1629.22	983.008	214	-4.75805	0.266686	0.27		0.18	0.124		214	-4.35528	0.802373	1.7		0.272	0.16		213	-7.58673	0.796873	0.4		0.323		0.0005556	214	3.40531	9.30934	0.8		0.532	0.32
2013-08-03 23:30:00	2013-08-03 14:00:00	1578.89	915.949	215	-4.87484	0.307551						215	-4.4702	0.660559						214	-7.98358	0.814247						215	2.21945	8.5878
2013-08-04 23:30:00	2013-08-04 14:00:00	403.356	403.336	216	-4.67096	0.165543						216	-4.40064	0.355633						215	-8.40243	0.476857						216	-0.606603	4.50282
2013-08-05 23:30:00	2013-08-05 14:00:00	1187.28	669.023	217	-4.63657	0.323008						217	-4.16112	0.538249						216	-7.60918	0.232113						217	1.0169	6.58747
2013-08-06 23:30:00	2013-08-06 14:00:00	1482.11	916.56	218	-4.63602	0.470228						218	-3.99319	0.642398						217	-7.12468	0.367422						218	1.34546	7.63811
2013-08-07 23:30:00	2013-08-07 14:00:00	1244.78	745.78	219	-4.53533	0.440767						219	-3.88969	0.564878						218	-6.71496	0.451769						219	0.700055	6.34673
2013-08-08 23:30:00	2013-08-08 14:00:00	1188.94	695.58	220	-4.5386	0.442359						220	-3.80391	0.522564						219	-6.11124	0.388937						220	-0.273845	5.52983
2013-08-09 23:30:00	2013-08-09 14:00:00	1177.58	630.082	221	-4.13108	0.427634						221	-3.54528	0.466135						220	-5.67252	0.356698						221	0.230327	4.62178
2013-08-10 23:30:00	2013-08-10 14:00:00	1063.57	667.756	222	-3.84422	0.510683						222	-3.27371	0.50683						221	-4.75443	0.317397						222	0.354488	4.64601
2013-08-11 23:30:00	2013-08-11 14:00:00	1105.44	753.949	223	-3.5786	0.624999						223	-3.01957	0.575343						222	-4.17153	0.345464						223	0.647694	4.83268
2013-08-12 23:30:00	2013-08-12 14:00:00	1433.67	795.112	224	-3.31981	0.694733						224	-2.81328	0.575963						223	-3.65771	0.392668						224	0.164517	4.42412
2013-08-13 23:30:00	2013-08-13 14:00:00	721.389	477.754	225	-3.37803	0.468692						225	-2.81885	0.401728						224	-3.23168	0.397669						225	-1.07173	2.54166
2013-08-14 23:30:00	2013-08-14 14:00:00	1325.22	818.379	226	-2.89268	0.814814	0.266667		0.115988		-0.209	226	-2.4631	0.595693	0.3		0.11128		-0.22	225	-2.88357	0.265857	0.2		0.0738487		-0.218	226	-0.154267	3.44847	0.6		0.478058	0.17	-0.215
2013-08-15 23:30:00	2013-08-15 14:00:00	1045.06	738.563	227	-3.01631	0.756954						227	-2.46732	0.569294						226	-2.40538	0.41707						227	-0.534802	3.20677
2013-08-16 23:30:00	2013-08-16 14:00:00	1475.78	885.916	228	-3.13252	0.885821						228	-2.47598	0.618643						227	-2.33965	0.456162						228	-0.733982	3.61343
2013-08-17 23:30:00	2013-08-17 14:00:00	1510	870.125	229	-3.36616	0.87097						229	-2.54201	0.596774						228	-2.34701	0.573078						229	-1.057	3.50446
2013-08-18 23:30:00	2013-08-18 14:00:00	1404.44	771.586	230	-3.87122	0.764114						230	-2.70651	0.536523						229	-2.36013	0.615578						230	-1.81735	3.09197
2013-08-19 23:30:00	2013-08-19 14:00:00	867.433	497.26	231	-4.37699	0.523414						231	-2.88531	0.413795						230	-2.481	0.606563						231	-2.38354	2.22494
2013-08-20 23:30:00	2013-08-20 14:00:00	348.2	207.063	232	-4.65289	0.22329						232	-3.05504	0.204029						231	-2.55272	0.505363						232	-3.05261	1.01052
2013-08-21 23:30:00	2013-08-21 14:00:00	673.144	434.151	233	-4.43006	0.465758						233	-2.85435	0.371815						232	-2.64884	0.270259						233	-1.9145	1.96842
2013-08-22 23:30:00	2013-08-22 14:00:00	1356.33	810.383	234	-4.08409	0.855267						234	-2.61563	0.582483						233	-2.32496	0.532591						234	-0.55882	3.33735
2013-08-23 23:30:00	2013-08-23 14:00:00	1374.67	815.96	235	-4.33771	0.866657						235	-2.65645	0.584692						234	-1.95425	0.893644						235	-0.692989	3.34664
2013-08-24 23:30:00	2013-08-24 14:00:00	1341	827.724	236	-4.56551	0.857237						236	-2.69089	0.575625						235	-1.95171	0.954261						236	-0.75806	3.28178
2013-08-25 23:30:00	2013-08-25 14:00:00	1331.03	810.063	237	-4.66893	0.848748						237	-2.69157	0.571962						236	-1.91474	0.995669						237	-0.768129	3.23378
2013-08-26 23:30:00	2013-08-26 14:00:00	1357.67	860.999	238	-4.60903	0.901366						238	-2.64334	0.591364						237	-1.85589	1.04575						238	-0.478613	3.3648
2013-08-27 23:30:00	2013-08-27 14:00:00	971.389	511.858	239	-5.10692	0.543729						239	-2.84044	0.399683						238	-1.69997	1.13652						239	-1.72895	2.13317
2013-08-28 23:30:00	2013-08-28 14:00:00	1075.22	670.873	240	-5.10046	0.730154						240	-2.7452	0.504805						239	-2.03096	0.820133						240	-1.1524	2.7582
2013-08-29 23:30:00	2013-08-29 14:00:00	1417.11	839.2	241	-5.31457	0.896177						241	-2.72861	0.575013						240	-1.80585	1.07671						241	-0.761919	3.22684
2013-08-30 23:30:00	2013-08-30 14:00:00	1115	561.94	242	-5.779	0.575882						242	-2.9148	0.393507						241	-1.69814	1.22773						242	-1.82823	2.12584
2013-08-31 23:30:00	2013-08-31 14:00:00	1014.46	605.081	243	-8.44315	0.258133						243	-3.14848	0.183324						242	-2.5225	0.396008						243	-1.71829	2.33472
2013-09-01 23:30:00	2013-09-01 14:00:00	833.144	500.013	244	-9.26033	0						244	-3.23471	0						243	-2.86219	0.19216						244	-1.7422	2.07476
2013-09-02 23:30:00	2013-09-02 14:00:00	542.3	276.604	245	-7.35872	0						245	-3.08869	0						244	-2.83218	0						245	-2.42203	1.22249
2013-09-03 23:30:00	2013-09-03 14:00:00	1445.33	880.97	246	-6.66952	0						246	-3.10161	0						245	-2.78112	0						246	-0.694981	3.10507
2013-09-04 23:30:00	2013-09-04 14:00:00	686.622	359.982	247	-5.24932	0						247	-3.06977	0						246	-3.04482	0						247	-2.28813	1.49668
2013-09-05 23:30:00	2013-09-05 14:00:00	1150.31	679.23	248	-4.27468	0						248	-3.02236	0.0890475						247	-3.06245	0						248	-1.47324	2.44938
2013-09-06 23:30:00	2013-09-06 14:00:00	1402.78	845.121	249	-4.05517	0						249	-2.52797	0.434264						248	-3.21941	0.105317						249	-0.90056	2.86989
2013-09-07 23:30:00	2013-09-07 14:00:00	1398.56	866.996	250	-3.91835	0						250	-2.12258	0.77012						249	-2.73643	0.515101						250	-0.961077	2.78163
2013-09-08 23:30:00	2013-09-08 14:00:00	1354.67	769.223	251	-3.76477	0						251	-1.77628	1.05076						250	-2.39332	0.913682						251	-1.26401	2.45971
2013-09-09 23:30:00	2013-09-09 14:00:00	162.859	131.513	252	-3.50489	0						252	-2.11435	0.64703						251	-2.14165	1.23903						252	-3.06952	0.623545
2013-09-10 23:30:00	2013-09-10 14:00:00	1144.33	607.723	253	-3.21821	0						253	-1.17699	1.46002						252	-2.55722	0.704783						253	-1.78445	1.85077
2013-09-11 23:30:00	2013-09-11 14:00:00	933.122	482.288	254	-3.10445	0						254	-1.17699	1.46002						253	-1.5718	1.67392						254	-2.17148	1.56819
2013-09-12 23:30:00	2013-09-12 14:00:00	584.711	324.001	255	-2.97079	0						255	-0.368088	1.65606						254	-1.50183	1.85563						255	-2.72661	1.20838
2013-09-13 23:30:00	2013-09-13 14:00:00	523.867	254.594	256	-2.97876	0						256	0.19828	1.46212						255	-1.70062	1.59623						256	-3.26878	0.970122
2013-09-14 23:30:00	2013-09-14 14:00:00	264.178	191.428	257	-3.0791	0						257	0.158823	1.24823						256	-1.95963	1.36074						257	-3.8741	0.772363
2013-09-15 23:30:00	2013-09-15 14:00:00	420.033	290.354	258	-3.06106	0						258	-0.151596	1.1216						257	-2.35327	1.24996						258	-4.26697	0.641122
2013-09-16 23:30:00	2013-09-16 14:00:00	406.2	244.4	259	-3.05691	0						259	0.327528	1.44971						258	-1.96686	1.58016						259	-4.59925	0.343524
2013-09-17 23:30:00	2013-09-17 14:00:00	347.789	249.768	260	-2.90007	0						260	0.322444	1.27247						259	-2.15929	1.38216						260	-4.41787	0.354421
2013-09-18 23:30:00	2013-09-18 14:00:00	569.333	297.026	261	-2.6794	0						261	0.239594	1.31363						260	-1.925	1.37371						261	-4.16024	0.375013
2013-09-19 23:30:00	2013-09-19 14:00:00	601.011	324.189	262	-2.80698	0						262	-0.362301	1.31787						261	-1.69124	1.38681						262	-4.28561	0.40642
2013-09-20 23:30:00	2013-09-20 14:00:00	559.033	284.078	263	-2.76394	0						263	-0.679035	1.4102						262	-1.80317	1.51487						263	-4.28726	0.352082
2013-09-21 23:30:00	2013-09-21 14:00:00	451.511	285.545	264	-2.88524	0						264	-0.722673	1.25309						263	-1.95391	1.34216						264	-4.38988	0.388456
2013-09-22 23:30:00	2013-09-22 14:00:00	607.233	375.181	265	-2.9345	0						265	-0.707427	1.40006						264	-2.04591	1.49967						265	-4.38707	0.440744
2013-09-23 23:30:00	2013-09-23 14:00:00	456.056	282.789	266	-3.06502	0						266	-0.345511	1.49841						265	-2.05041	1.66483						266	-4.60694	0.362349
2013-09-24 23:30:00	2013-09-24 14:00:00	414.544	289.968	267	-2.97298	0						267	-0.402432	1.2969						266	-2.48493	1.45389						267	-4.49362	0.366488
2013-09-25 23:30:00	2013-09-25 14:00:00	553.233	327.588	268	-3.82907	0						268	-0.0448261	1.30216						267	-2.31493	1.43039						268	-4.23558	0.400079
2013-09-26 23:30:00	2013-09-26 14:00:00	365.899	210.354	269	-4.15903	0						269	-0.162043	1.39454						268	-2.62569	0.71797						269	-4.31546	0.282408
2013-09-27 23:30:00	2013-09-27 14:00:00	537.978	351.386	270	-3.09281	0						270	-0.659541	1.05372						269	-3.13685	0.159222						270	-4.04976	0.403813
2013-09-28 23:30:00	2013-09-28 14:00:00	415.167	240.445	271	-3.05584	0						271	-0.911725	1.39038						270	-3.06709	0.154729						271	-4.17319	0.32337
2013-09-29 23:30:00	2013-09-29 14:00:00	334.367	227.748	272	-2.8434	0						272	-1.19712	1.20296						271	-3.13513	0.159603						272	-4.03213	0.32058
2013-09-30 23:30:00	2013-09-30 14:00:00	419.922	265.621	273	-2.72217	0						273	-1.1746	1.21117						272	-2.97302	0.133507						273	-3.92249	0.351346
2013-10-01 23:30:00	2013-10-01 14:00:00	272.689	195.224	274	-2.63753	0						274	-1.31633	1.28222						273	-2.95576	0.135089						274	-3.93106	0.287902
2013-10-02 23:30:00	2013-10-02 14:00:00	286.478	210.7	275	-2.59932	0						275	-1.70843	1.12617						274	-2.90581	0.125655						275	-3.89256	0.301384
2013-10-03 23:30:00	2013-10-03 14:00:00	219.7	158.923	276	-2.30505	0						276	-1.64902	1.15373						275	-2.84549	0.110751						276	-3.73186	0.24743
2013-10-04 23:30:00	2013-10-04 14:00:00	229.178	173.558	277	-2.24898	0						277	-1.80819	1.00975						276	-2.65218	0.0885547						277	-3.68986	0.255297
2013-10-05 23:30:00	2013-10-05 14:00:00	491.367	318.633	278	-2.32508	0						278	-2.17614	1.02765						277	-2.75888	0.106403						278	-3.62241	0.382782
2013-10-06 23:30:00	2013-10-06 14:00:00	286.022	179.654	279	-2.54023	0						279	-2.09719	1.34058						278	-2.85866	0.116686						279	-3.92044	0.239815
2013-10-07 23:30:00	2013-10-07 14:00:00	233.856	172.948	280	-2.95384	0						280	-2.69576	0.936028						279	-3.12601	0.151811						280	-4.20352	0.230082
2013-10-08 23:30:00	2013-10-08 14:00:00	438.467	280.475	281	-3.17175	0						281	-2.55119	0.896575						280	-3.64318	0.213089						281	-4.22976	0.326347
2013-10-09 23:30:00	2013-10-09 14:00:00	404.078	273.044	282	-2.91591	0						282	-1.73701	1.16264						281	-3.76838	0.214126						282	-4.05256	0.335245
2013-10-10 23:30:00	2013-10-10 14:00:00	448.367	285.519	283	-3.16766	0						283	-1.60261	1.22419						282	-3.48604	0.176872						283	-4.21128	0.341088
2013-10-11 23:30:00	2013-10-11 14:00:00	479.6	316.319	284	-3.25324	0						284	-1.72902	1.22619						283	-3.93611	0.227873						284	-4.23719	0.362119
2013-10-12 23:30:00	2013-10-12 14:00:00	486.067	277.31	285	-3.29055	0						285	-1.51261	1.26591						284	-1.50779	1.85563						285	-4.30972	0.30747
2013-10-13 23:30:00	2013-10-13 14:00:00	87.0767	118.58	286	-3.20526	0						286	-1.4408	1.09543						285	-1.74684	1.59623						286	-4.39565	0.161831
2013-10-14 23:30:00	2013-10-14 14:00:00	329.522	230.946	287	-2.72998	0						287	-1.42901	0.678611						286	-2.05148	1.36074						287	-3.96046	0.298087
2013-10-15 23:30:00	2013-10-15 14:00:00	438.222	264.426	288	-2.86273	0						288	-1.3918	1.12028						287	-2.50324	1.24996						288	-4.04213	0.318279
2013-10-16				289								289								288	-2.16476	1.58016						289
2013-10-17				290								290								289	-2.40522	1.38216						290
2013-10-18				291								291								290	-2.18746	1.37371						291
2013-10-19				292								292								291	-1.95	1.38681						292
2013-10-20				293								293								292	-2.13803	1.51487						293
2013-10-21				294								294								293	-2.31703	1.34216						294
2013-10-22				295								295								294	-2.49837	1.49967						295
2013-10-23				296								296								295	-2.56544	1.66483						296
2013-10-24				297								297								296	-3.1086	1.45389						297
2013-10-25				298								298								297	-2.94077	1.43039						298
2013-10-26				299								299								298	-3.3035	0.609664						299
2013-10-27				300								300								299	-3.8829	0						300
2013-10-28				301								301								300	-3.78033	0						301
2013-10-29				302								302								301	-3.90948	0						302
2013-10-30				303								303								302	-3.67781	0						303
2013-10-31				304								304								303	-3.64914	0						304
2013-11-01				305								305								304	-3.58757	0						305
2013-11-02				306								306								305		0						306
2013-11-03				307								307								306		0						307
2013-11-04				308								308								307		0						308
2013-11-05				309								309								308		0						309
2013-11-06				310								310								309		0						310
2013-11-07				311								311								310		0						311
2013-11-08				312								312								311		0						312
2013-11-09				313								313								312		0						313
2013-11-10				314								314								313		0						314
2013-11-11				315								315								314		0						315
2013-11-12				316								316								315		0						316
2013-11-13				317								317								316		0						317
2013-11-14				318								318								317		0						318
2013-11-15				319								319								318		0						319
2013-11-16				320								320								319		0						320
2013-11-17				321								321								320		0						321
2013-11-18				322								322								321		0						322
2013-11-19				323								323								322		0						323
2013-11-20				324								324								323		0						324
2013-11-21				325								325								324		0						325
2013-11-22				326								326								325		0						326
2013-11-23				327								327								326		0						327
2013-11-24				328								328								327		0						328
2013-11-25				329								329								328		0						329
2013-11-26				330								330								329		0						330
2013-11-27				331								331								330		0						331
2013-11-28				332								332								331		0						332
2013-11-29				333								333								332		0						333
2013-11-30				334								334								333		0						334
2013-12-01				335								335								334		0						335
2013-12-02				336								336								335		0						336
2013-12-03				337								337								336		0						337
2013-12-04				338								338								337		0						338
2013-12-05				339								339								338		0						339
2013-12-06				340								340								339		0						340
2013-12-07				341								341								340		0						341
2013-12-08				342								342								341		0						342
2013-12-09				343								343								342		0						343
2013-12-10				344								344								343		0						344
2013-12-11				345								345								344		0						345
2013-12-12				346								346								345		0						346
2013-12-13				347								347								346		0						347
2013-12-14				348								348								347		0						348
2013-12-15				349								349								348		0						349
2013-12-16				350								350								349		0						350
2013-12-17				351								351								350		0						351
2013-12-18				352								352								351		0						352
2013-12-19				353								353								352		0						353
2013-12-20				354								354								353		0						354
2013-12-21				355								355								354		0						355
2013-12-22				356								356								355		0						356
2013-12-23				357								357								356		0						357
2013-12-24				358								358								357		0						358
2013-12-25				359								359								358		0						359
2013-12-26				360								360								359		0						360
2013-12-27				361								361								360		0						361
2013-12-28				362								362								361		0						362
2013-12-29				363								363								362		0						363
2013-12-30				364								364								363		0						364
2013-12-31				365								365								364		0						365
																				365		0
